# Supplementary material
Source: PubMed Central journal article supplement (PMC7007383)
Supplement: NIHMS1544863-supplement-2.pdf [file NIHMS1544863-supplement-2.pdf]

# Supplementary Figure 1 (A-G)

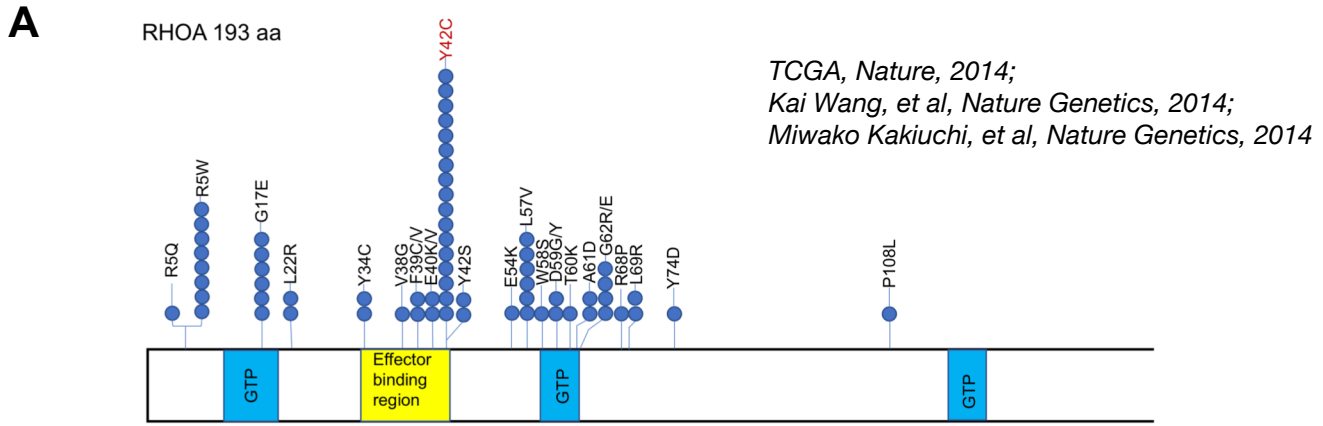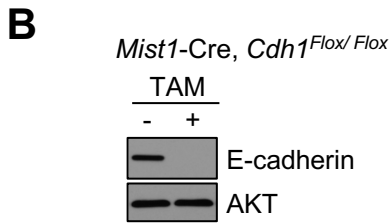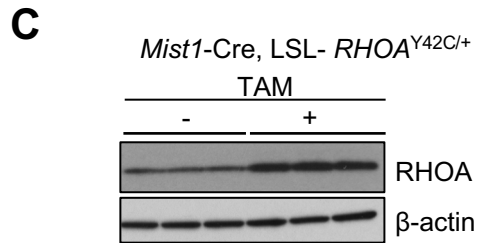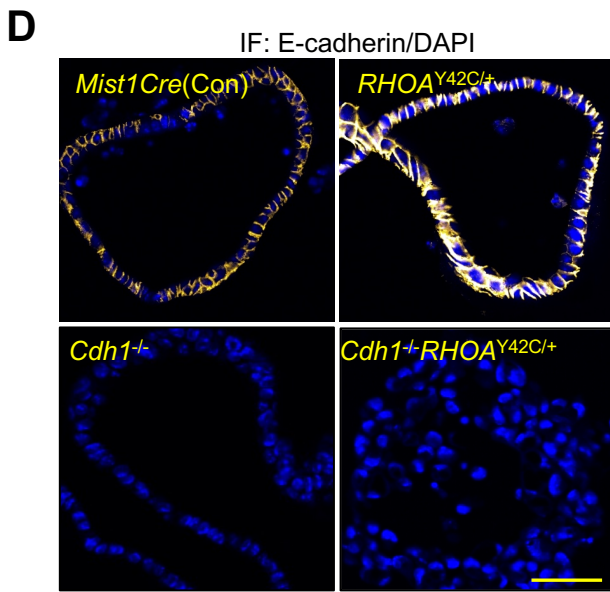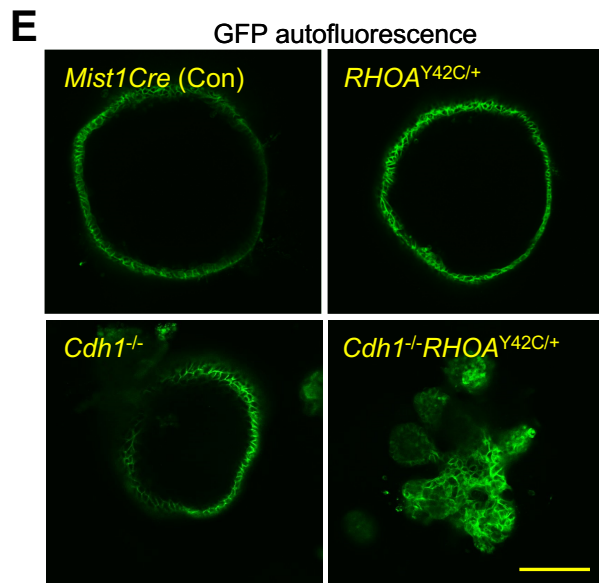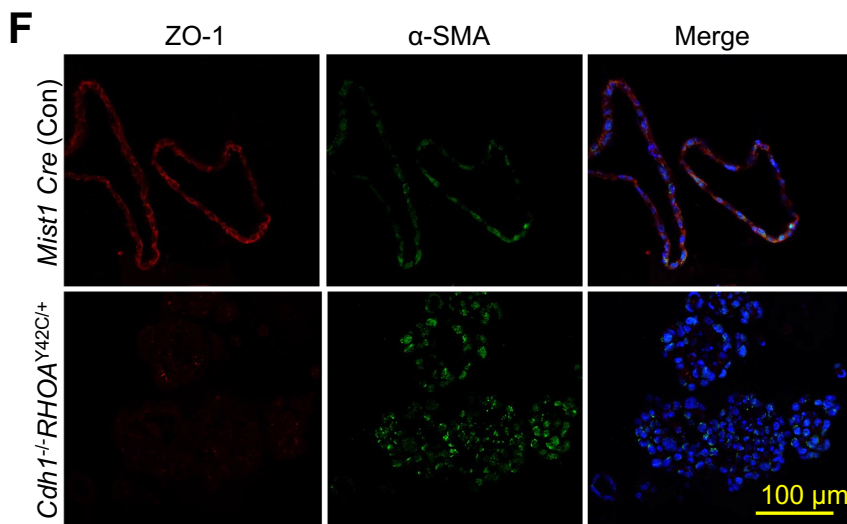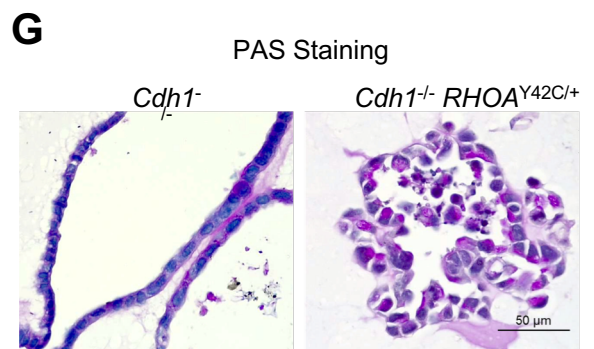

# Supplementary Figure 1 (H-K)

**H**

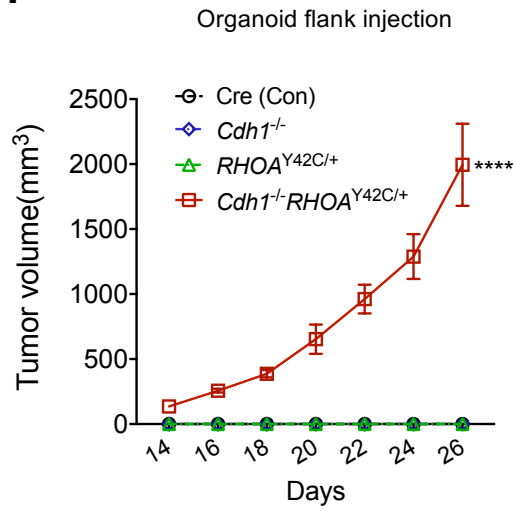

**I**

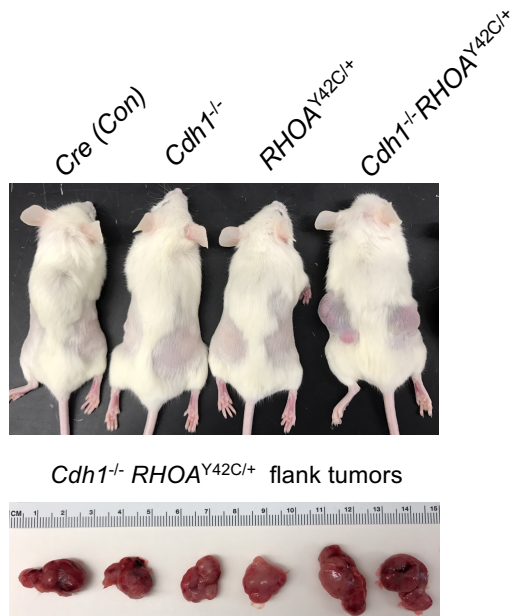

**J**

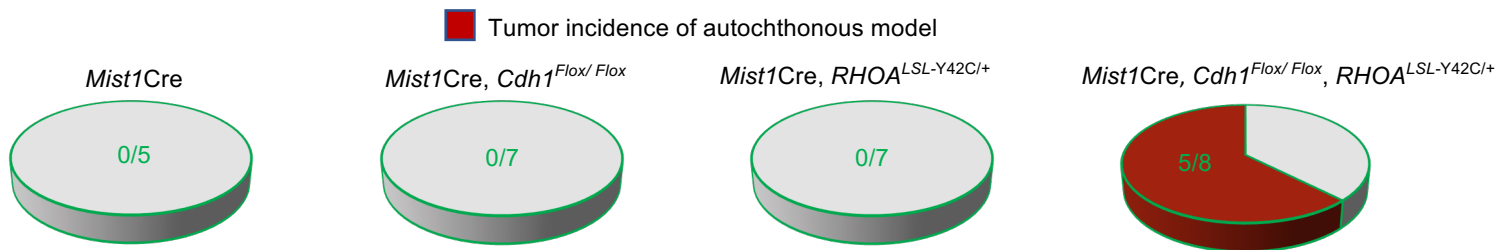

**K**

H&E staining of autochthonous model

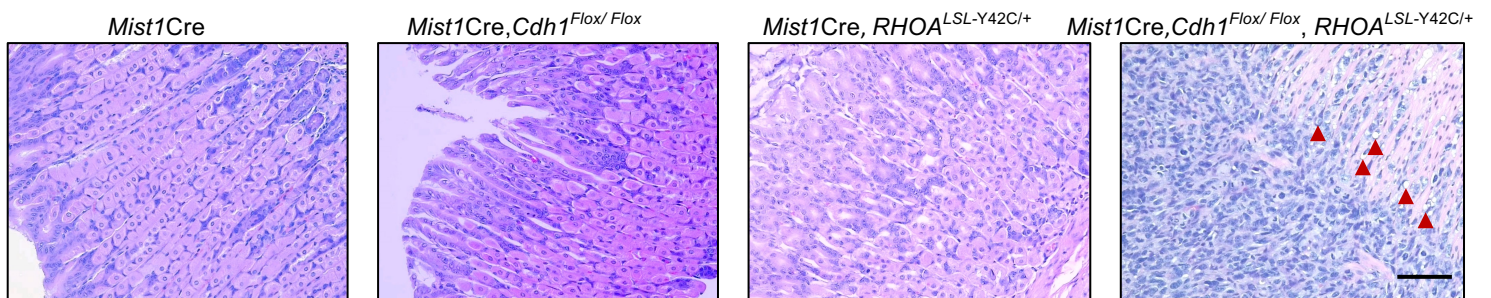

## Supplementary Figure 1. Model the pathogenesis of diffuse gastric cancer

**A**, Spectrum of RHOA mutations in gastric cancers, compiled from TCGA and two contemporaneous reports identifying these alterations. Immunoblots of E-cadherin (**B**) and RHOA (**C**) in organoids treated with or without tamoxifen (2  $\mu$ M) for 96 h (n = 3 independent experiments). **D**, Representative confocal immunofluorescence images of E-cadherin in the annotated organoids. Scale bar = 50  $\mu$ m. **E**, Representative confocal images of GFP autofluorescence in the annotated organoids. Scale bar = 100  $\mu$ m. **F**, Confocal immunofluorescence images of ZO-1 and  $\alpha$ -SMA in the indicated organoids. Scale bar = 100  $\mu$ m. **G**, Periodic acid-Schiff (PAS) staining of paraffin sections of the indicated organoids. Scale bar = 50  $\mu$ m. **H**, Tumor volumes following NSG flank implantation of organoids with annotated genotypes, showing tumor formation only by *Cdh1*<sup>-/-</sup>*RHOA*<sup>Y42C/+</sup> organoids. Data are mean  $\pm$  S.E.M., \*\*\*\**P*<0.0001, two-way ANOVA (*Cdh1*<sup>-/-</sup>*RHOA*<sup>Y42C/+</sup> versus other genotypes). **I**, Representative images of NSG flank tumors in panel (**H**). **J**, Autochthonous tumor incidence in mice with annotated genotypes following 3 rounds of tamoxifen induction starting at 6-8 weeks of age. **K**, Representative H&E images of gastric tissue with autochthonous induction of distinct alleles. Samples obtained 14 months following tamoxifen induction. Red arrows: cells resembling signet-ring cells. Scale bar = 100  $\mu$ m.

# Supplementary Figure 2

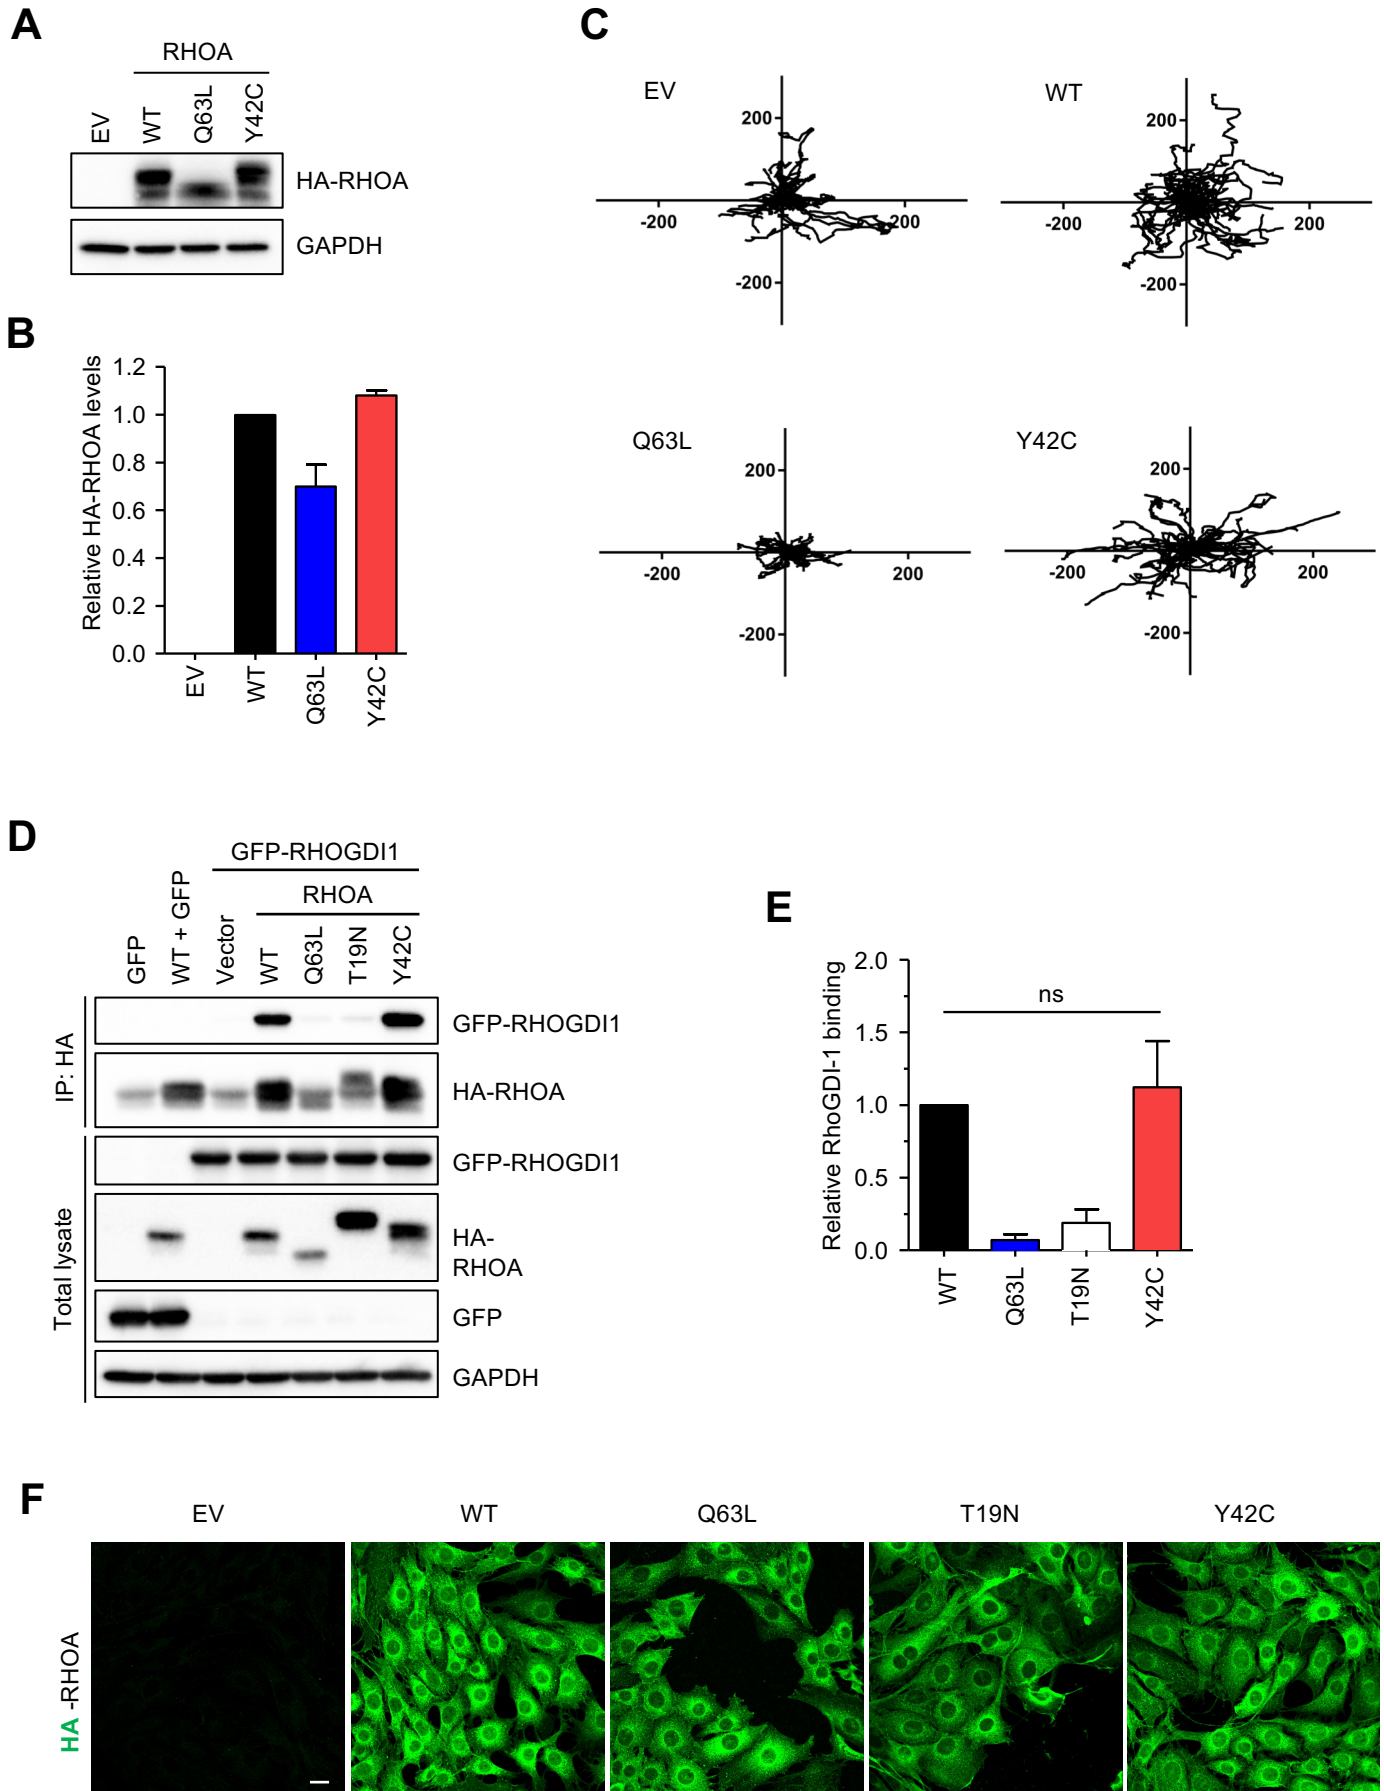

## Supplementary Figure 2. Cellular and biochemical properties of RHOA<sup>Y42C</sup>

Immunoblot analyses of NIH/3T3 fibroblasts stably expressing exogenous HA epitope-tagged RHOA proteins, using anti-HA to detect HA-RHOA proteins and anti-GAPDH to monitor for equivalent loading of total cellular protein. Blot (A) is representative of  $n = 3$ . Quantitation (B) shows mean data  $\pm$  S.E.M. C, Plots showing the random migration tracks of HA-RHOA-expressing NIH/3T3 cells from Fig. 2G were captured by time lapse microscopy. Data are representative of  $n = 4$  (25 cells per experiment). COS-7 cells transiently co-expressing HA-RHOA and/or EGFP-RHOGDI1 were used for immunoprecipitation analyses with anti-HA epitope-conjugated agarose beads to monitor the amount of co-precipitating GFP-RHOGDI using a GFP antibody. Blot (D) is representative of  $n = 3$ . Quantitation (E) shows mean data  $\pm$  S.E.M. ns, not significant; unpaired two-tailed *t*-test. F, Immunofluorescence images of NIH/3T3 cells stably expressing HA-RHOA proteins. Images are representative of two independent experiments. Scale bar = 20  $\mu$ m.

# Supplementary Figure 3

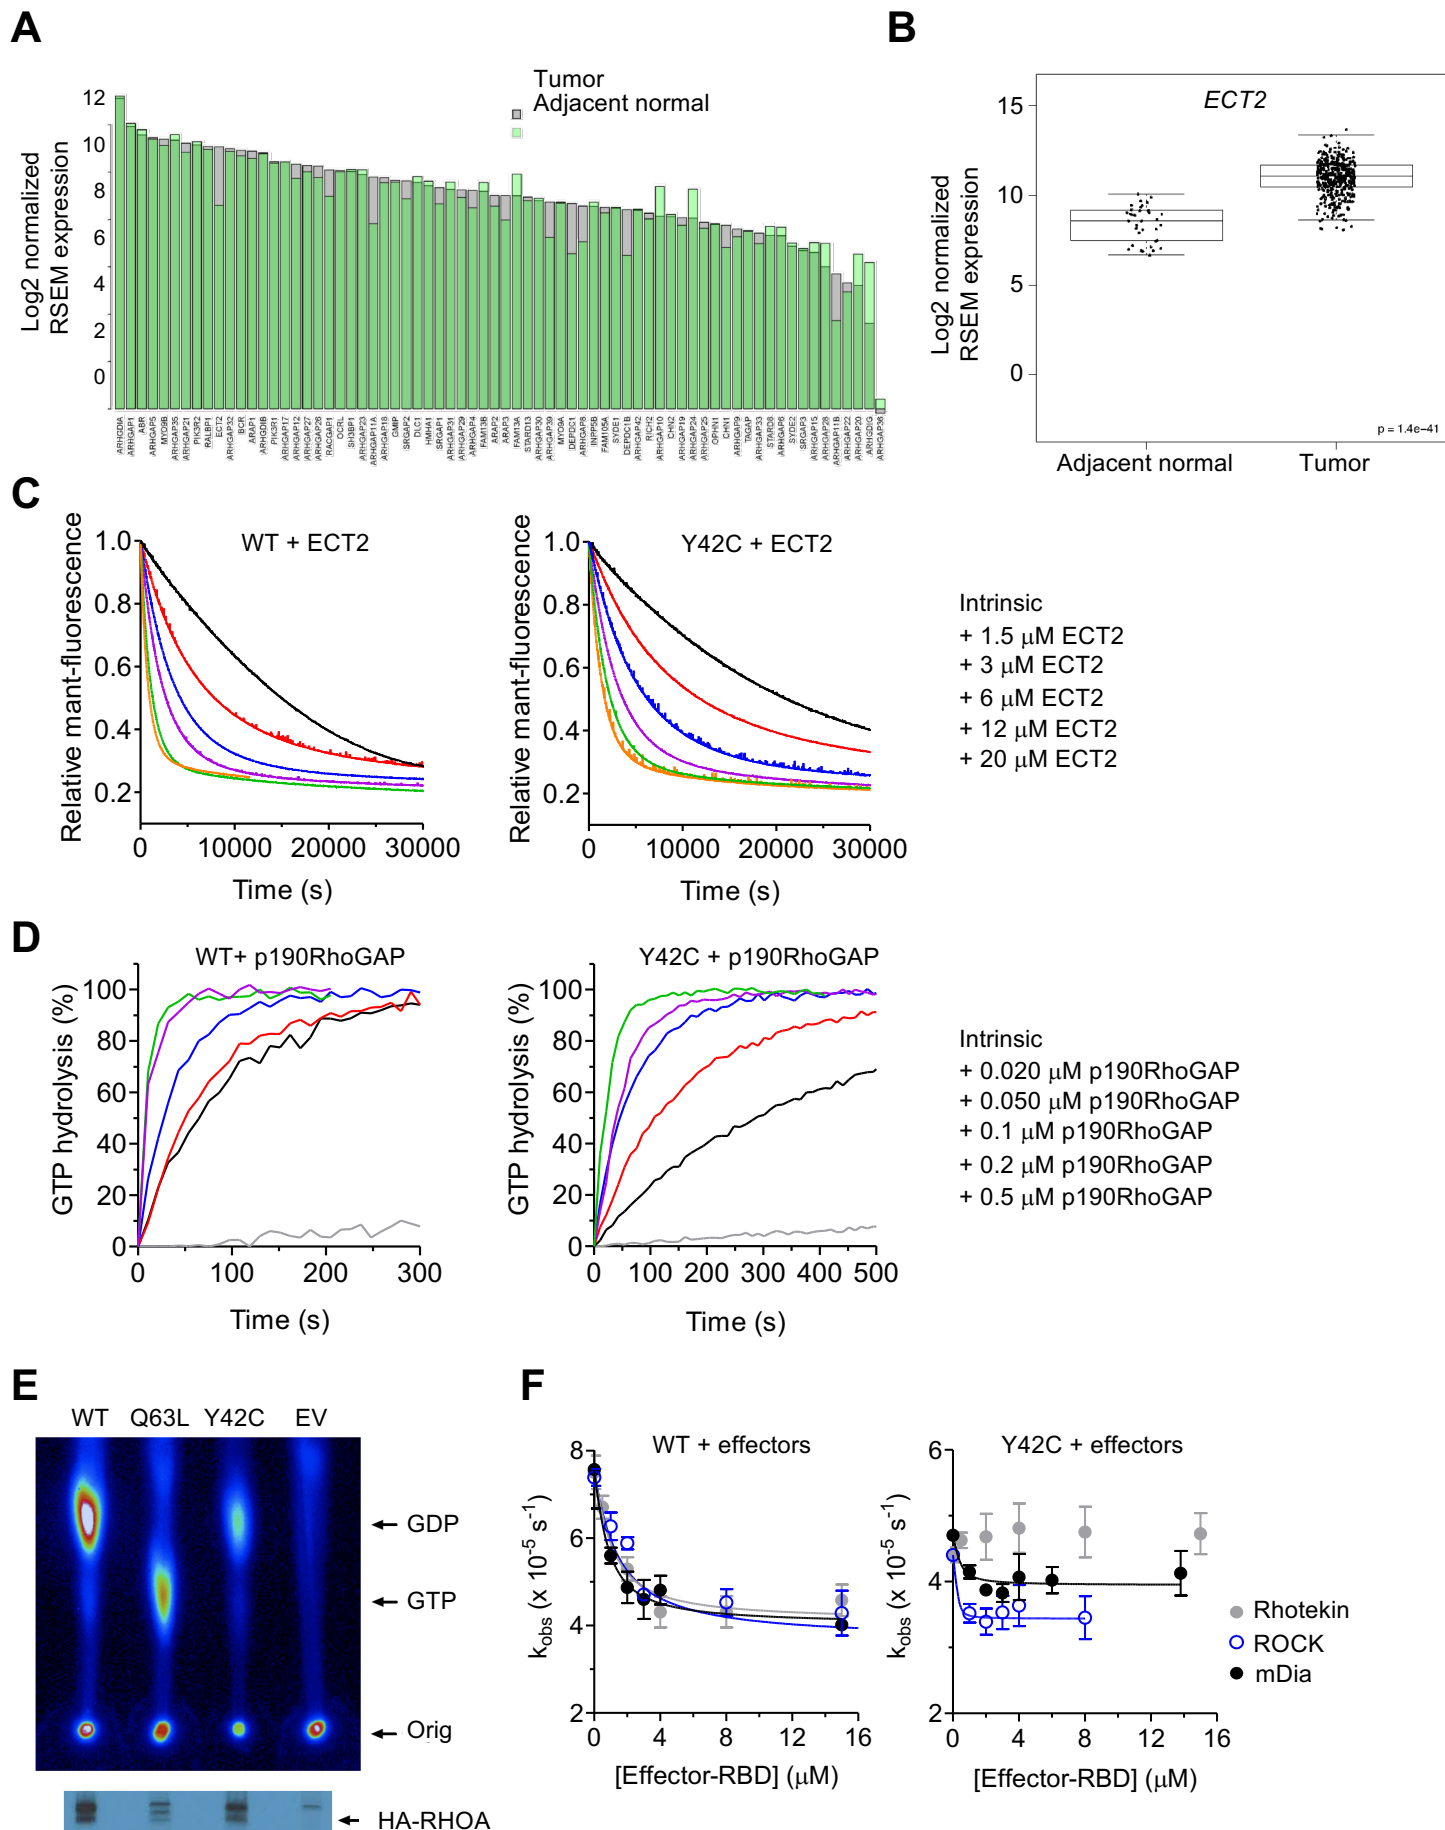

### Supplementary Figure 3. Expression analysis of RHOA and its regulators, and the mechanistic basis of RHOA<sup>Y42C</sup>

(A) RhoGEF and RhoGAP expression data from TCGA. Median expression values for genes were plotted for tumors (n=415) and cancer adjacent normals (n=35) and ordered by median expression level in tumors. (B) Box plot of gene expression values for *ECT2* in TCGA tumors and cancer-adjacent normal. (C) Kinetics of intrinsic and RhoGEF *ECT2*-catalyzed RHOA nucleotide exchange on RHOA WT (left) and RHOA<sup>Y42C</sup> (right). Data shown are representative of three independent experiments. Observed rates  $k_{\text{obs}}$  to determine  $k_{\text{cat}}$  are in Fig. 3B. (D) Kinetics of the intrinsic and p190RhoGAP-stimulated GTP hydrolysis activities of RHOA WT (left panel) and RHOA<sup>Y42C</sup> (right panel) of a representative GAP assay, using indicated GAP concentrations and the phosphate binding protein sensor. Observed rates  $k_{\text{obs}}$  to determine  $k_{\text{cat}}$  are in Fig. 3G. (E) NIH/3T3 cells stably expressing HA-RHOA were used for metabolic <sup>32</sup>P labeling. HA-RHOA proteins were isolated by immunoprecipitation with anti-HA epitope-conjugated agarose beads. Incorporated <sup>32</sup>P signal of HA-RHOA bound GDP and GTP was detected by thin-layer chromatography and phosphor imaging (top). To monitor for equal HA-RHOA expression, cells were in parallel labeled with <sup>35</sup>S methionine, followed by immunoprecipitation of HA-RHOA and immunoblot analyses with anti-HA (bottom). Blots are representative of two independent experiments. (F) RHOA binding affinities to the RBDs of Rhotekin, ROCK and mDia (concentrations as indicated) were measured based on the observed rate  $k_{\text{obs}}$  of the inhibition of the mantGppNHp nucleotide dissociation (GDI effect, n = 3). Data are mean ± S.E.M.

# Supplementary Figure 4 (A-F)

**A**

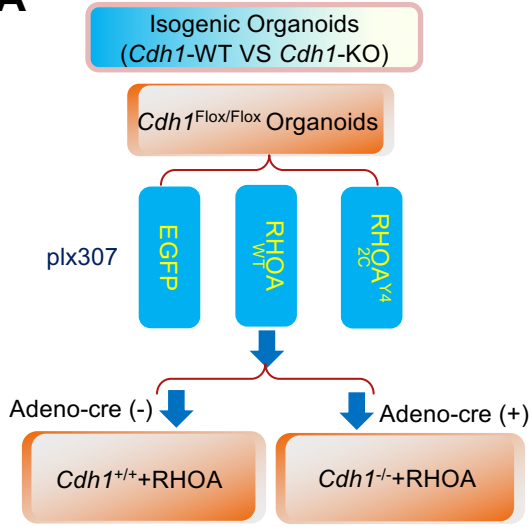

**B**

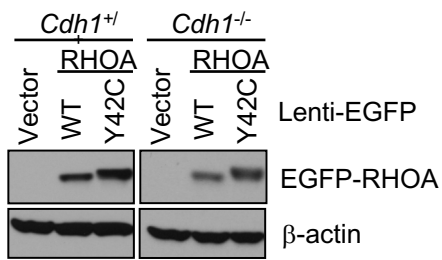

**C**

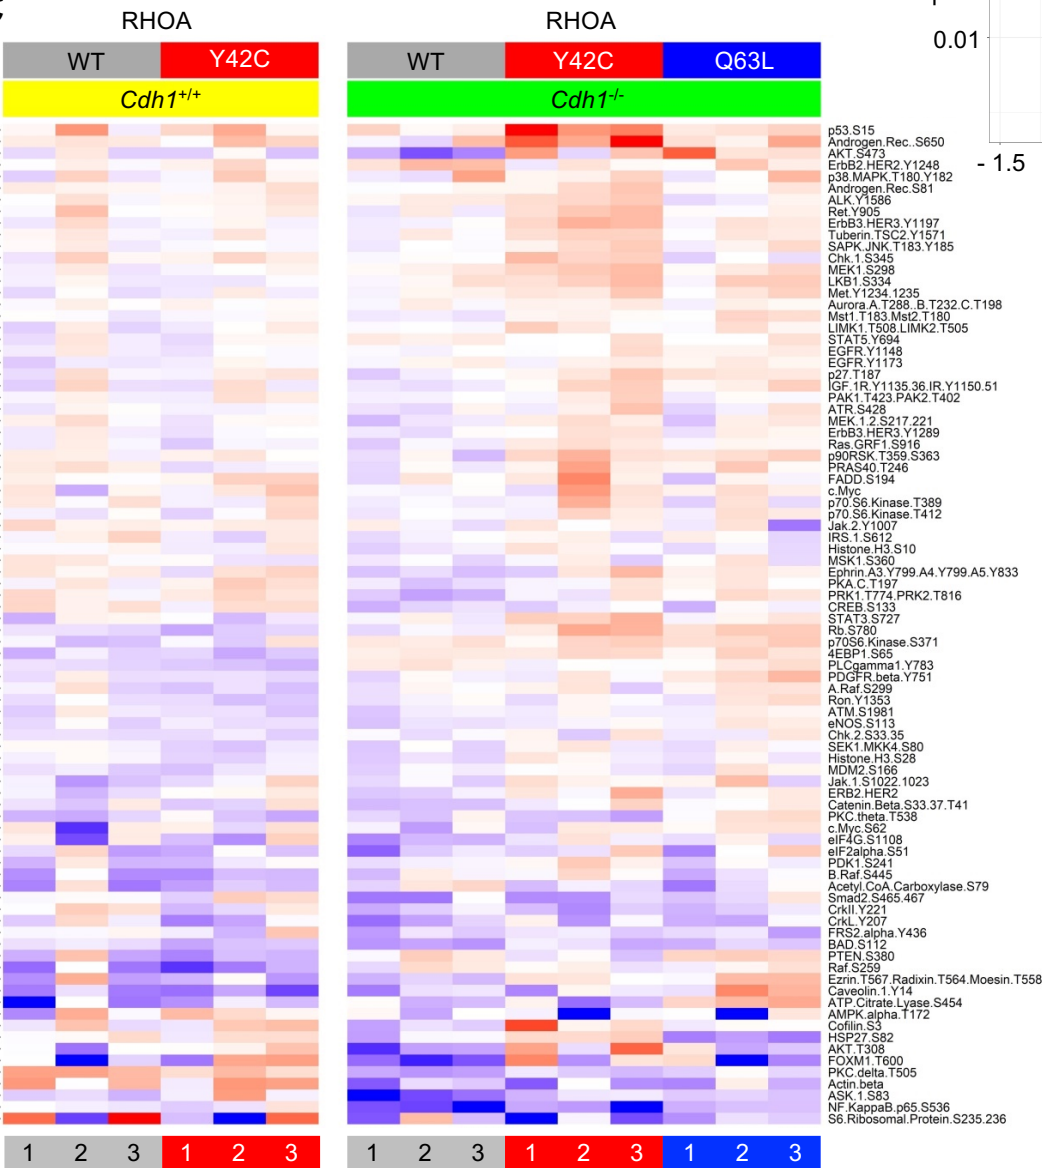

**D**

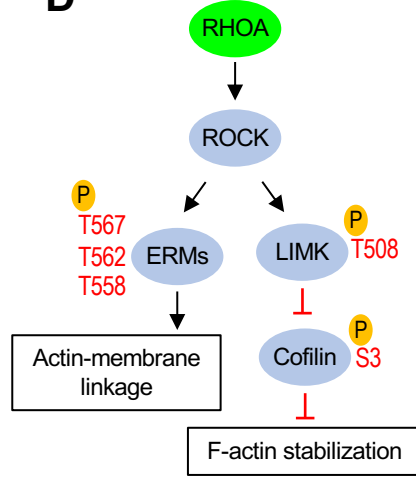

**E**

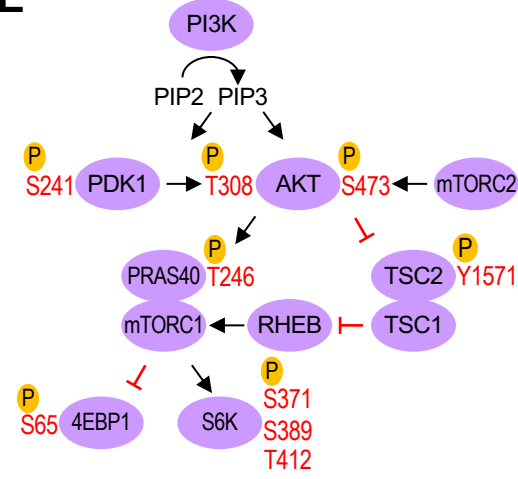

**F**

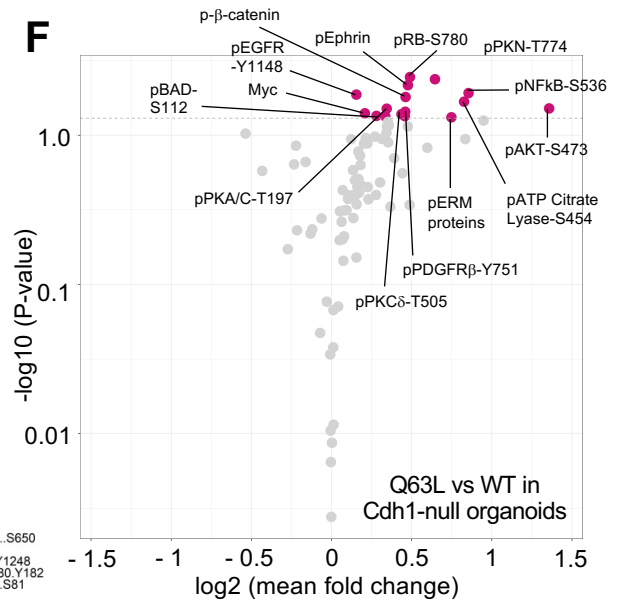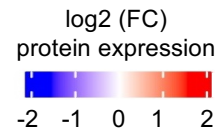



# Supplementary Figure 4 (G-P)

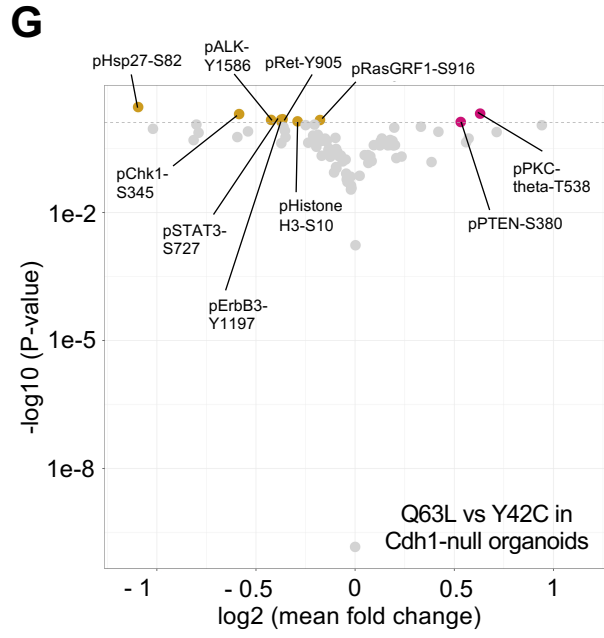

**H** Orthotopic implantation of *Cdh1*<sup>-/-</sup> *RHOA*<sup>Y42C/+</sup> organoids

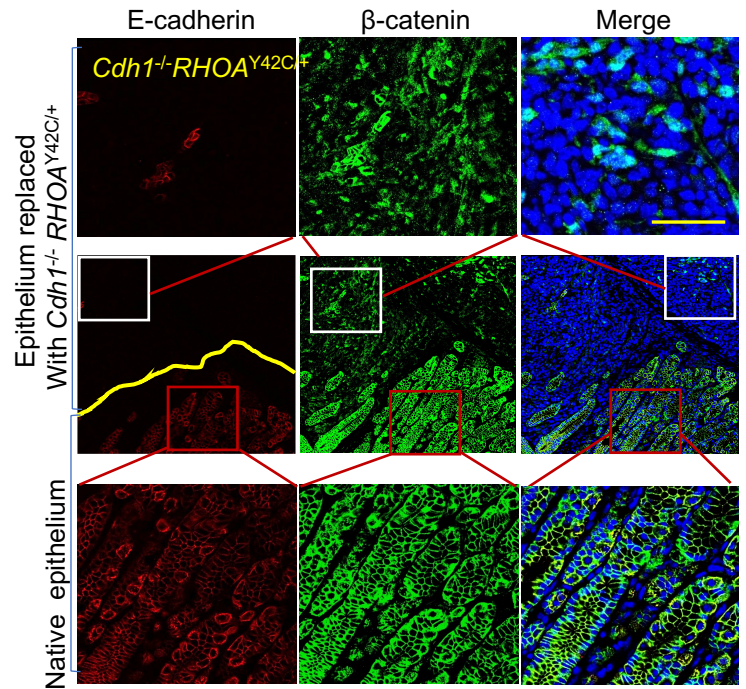

**I** Orthotopic implantation of *Cdh1*<sup>-/-</sup> organoids

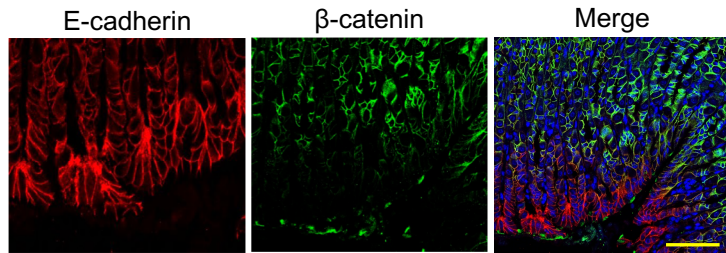

**J** Orthotopic implantation of *RHOA*<sup>Y42C/+</sup> organoids

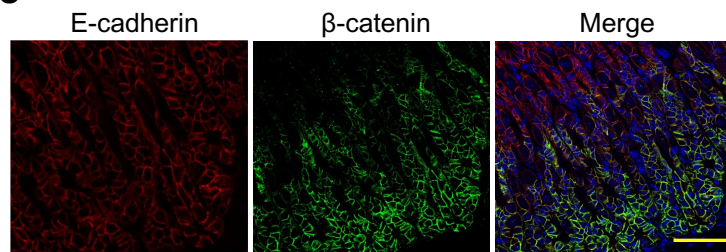

**K**

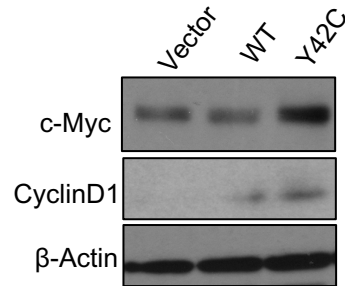

**L**

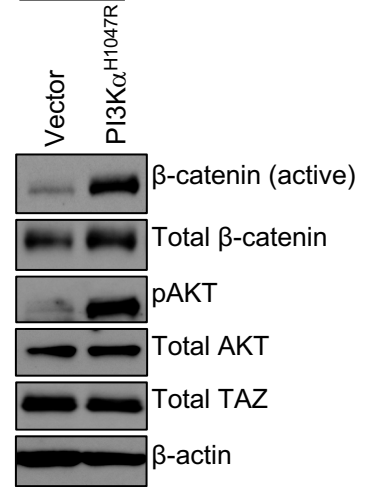

**M**

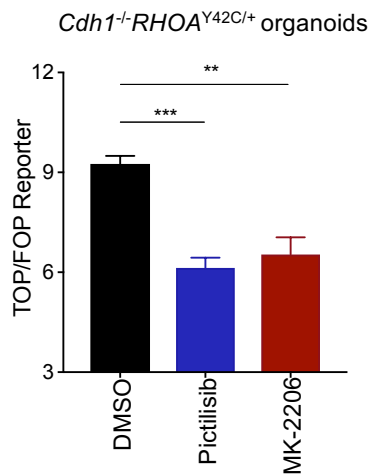

**N**

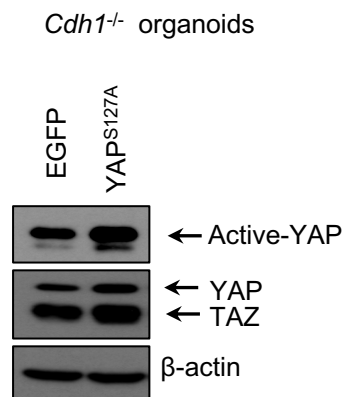

**O**

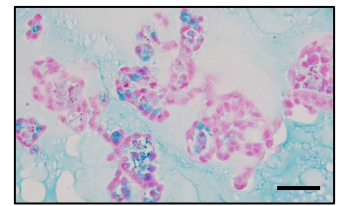

**P**

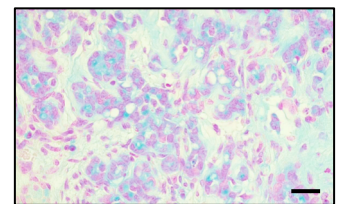

## Supplementary Figure 4. *Cdh1* loss and RHOA-Y42C induces AKT and $\beta$ -catenin activation

(A) Schematic for the generation of isogenic organoids with or without *Cdh1* loss and engineered with lenti-EGFP-RHOA<sup>-Y42C</sup> or controls. (B) Representative immunoblotting for ectopic lenti-RHOA expression in isogenic organoids from panel (A) (n = 3 independent experiments). (C) All antibodies from RPPA analysis of isogenic gastric organoids with annotated genotypes. *Cdh1*<sup>+/+</sup> and *Cdh1*<sup>-/-</sup> fold change values were calculated with respect to matched RHOA-EV controls per antibody. Resulting values were log<sub>2</sub> changed and clustered using k-means clustering for antibodies. Confocal immunofluorescence images for E-cadherin and  $\beta$ -catenin in NSG stomach epithelium injected with *Cdh1*<sup>-/-</sup>RHOA<sup>Y42C/+</sup> organoids (D-E) Models depicting proteins in RPPA antibody panel involved in (D) ROCK effector signaling and in (E) PI3K-AKT-mTORC1 signaling (see Fig. 4A). (F, G) Volcano plot representing RPPA results (F) comparing RHOA<sup>Q63L</sup> versus RHOA<sup>WT</sup> in *Cdh1*-null organoids or (G) comparing RHOA<sup>Q63L</sup> versus RHOA<sup>Y42C</sup> in *Cdh1*-null organoids. Significantly upregulated and downregulated proteins and phosphorylation sites are represented by pink and gold dots, respectively. Horizontal dotted line represents p-value threshold of 0.05. List of top hits is shown in Supplementary Table S1. (H) Bottom: native epithelium with normal E-cadherin and  $\beta$ -catenin in the cytoplasm. Top: epithelium replaced by *Cdh1*<sup>-/-</sup>RHOA<sup>Y42C/+</sup> organoids, with E-cadherin loss and  $\beta$ -catenin translocated into nucleus, scale bar= 50  $\mu$ m, or injected by *Cdh1*<sup>-/-</sup> organoids (I) or by RHOA<sup>Y42C/+</sup> organoids (J). Scale bar = 100  $\mu$ m. (K) Immunoblotting for c-Myc and CyclinD1 in *Cdh1*-null organoids with lentiviral EGFP-RHOA<sup>Y42C</sup> or controls (representative image from 3 independent experiments). (L) Immunoblots of *Cdh1*<sup>-/-</sup> organoids with ectopic expression of lenti-EGFP or lenti-PIK3CA (H1047R) (n = 3 independent experiments). (M) TOP/FOP Wnt/ $\beta$ -catenin reporter assay in *Cdh1*<sup>-/-</sup>RHOA<sup>Y42C/+</sup> cells treated with DMSO, PI3K inhibitor pictilisib (2  $\mu$ M) or AKT inhibitor MK-2206 (2  $\mu$ M) for 24 h. Data are mean  $\pm$  S.E.M. \*\**P*<0.01, \*\*\**P*<0.001, unpaired two-tailed Student's *t*-test. (N) Immunoblots of *Cdh1*<sup>-/-</sup> organoids infected with lenti-EGFP or active YAP (S127A). Image is representative of n = 3 independent experiments. (O) Representative image of Alcian blue staining of the *Cdh1*-null organoids with ectopic expression of YAP(S127A) and  $\beta$ -catenin(S33Y), Scale bar = 100  $\mu$ m. (P) Representative image of Alcian blue staining for the tumor from Fig. 4H. Scale bar = 100  $\mu$ m.

# Supplementary Figure 5

## A *Cdh1<sup>-/-</sup>RHOA<sup>Y42C/+</sup>* organoids

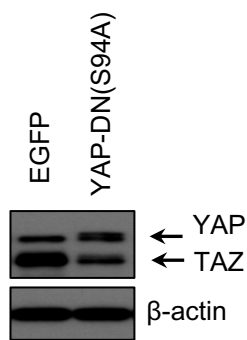

## B *Cdh1<sup>-/-</sup>RHOA<sup>Y42C/+</sup>* organoids

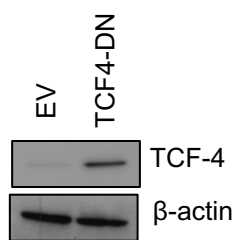

## C

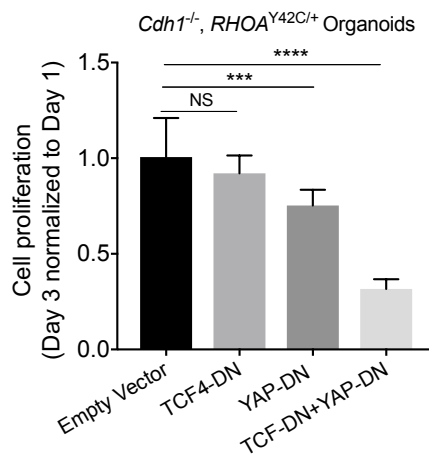

## D

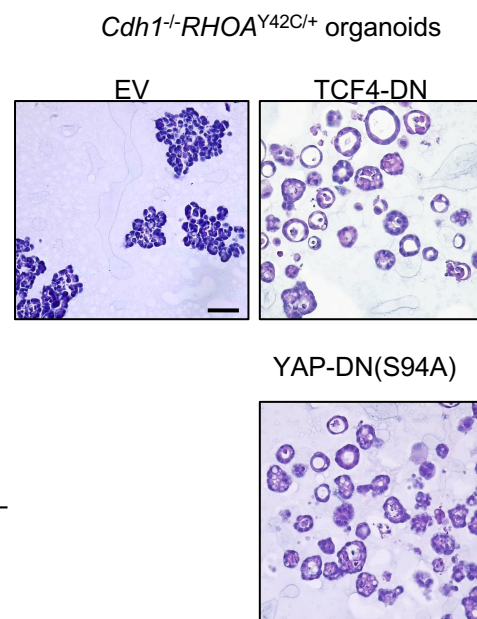

## E *Cdh1<sup>-/-</sup>RHOA<sup>Y42C/+</sup>* flank injection

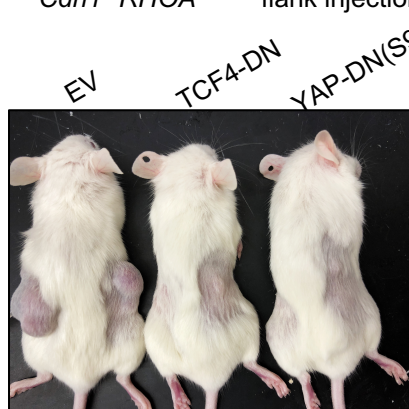

## F

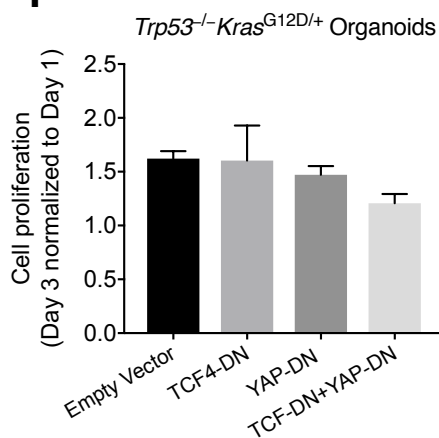

## H

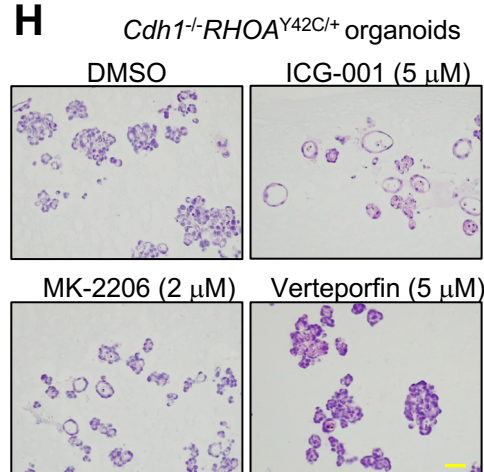

## G

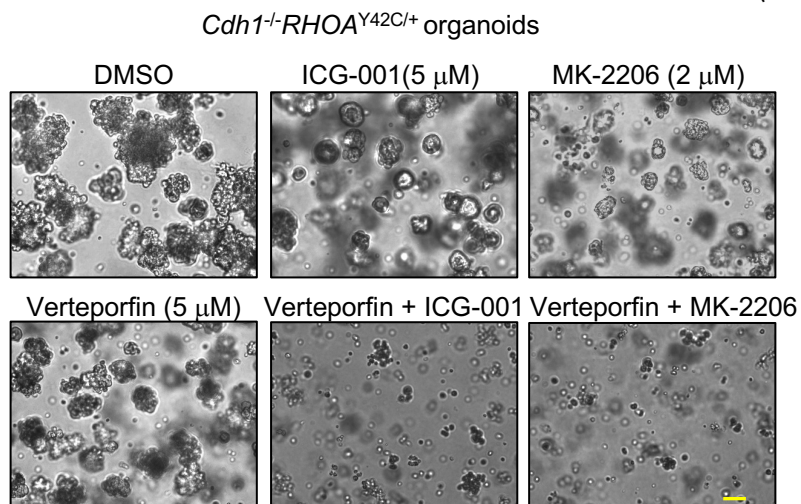

## I

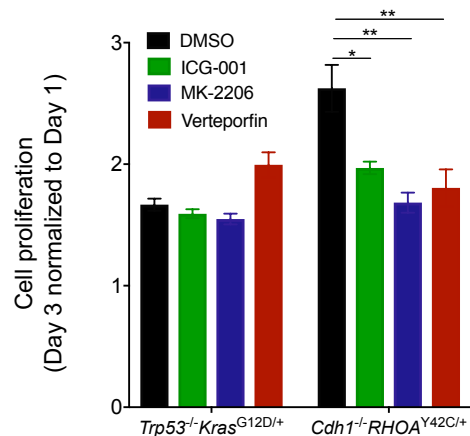

## J

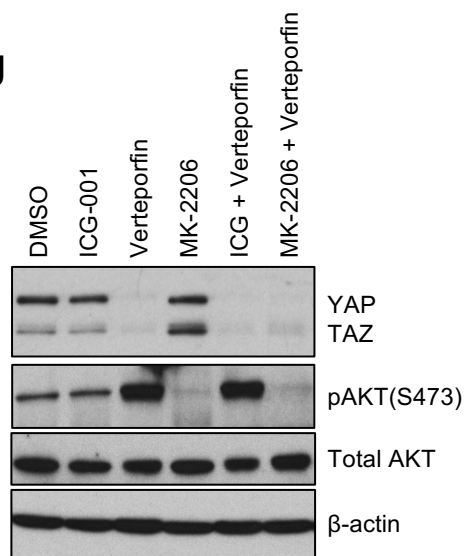

## K

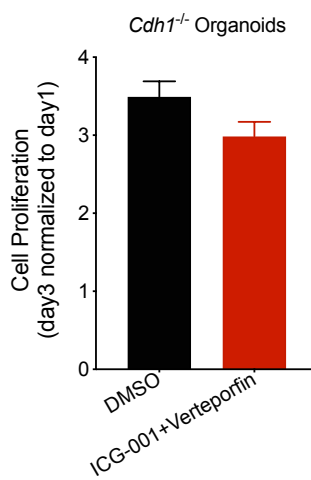

## L

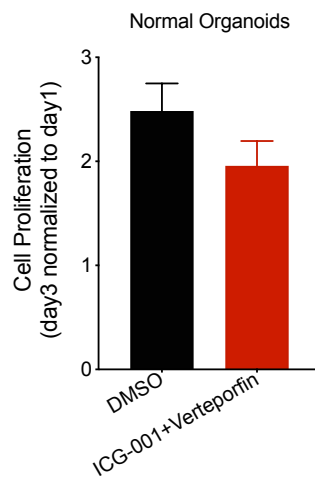

**Supplementary Figure 5. Wnt and YAP pathways are both required for the transformation of *Cdh1*<sup>-/-</sup>*RHOA*<sup>Y42C/+</sup> organoids**

(A) Immunoblots of *Cdh1*<sup>-/-</sup>*RHOA*<sup>Y42C/+</sup> organoids infected with lenti-EGFP or dominant negative YAP (S94A). Image is representative of n = 3 independent experiments. (B) Immunoblots of *Cdh1*<sup>-/-</sup> *RHOA*<sup>Y42C/+</sup> organoids infected with EV or dominant negative  $\beta$ -catenin cofactor TCF4 [TCF-DN (aa 1-31 del)]. (C) *In vitro* proliferation (CellTiter-Glo) of *Cdh1*<sup>-/-</sup>*RHOA*<sup>Y42C/+</sup> organoids with ectopic expression of TCF4-DN (aa 1-31 del), YAP-DN (S94A) or combination. Data are mean  $\pm$  S.E.M., \*\*\**P*<0.001, \*\*\*\**P*<0.001, NS: not significant, unpaired two-tailed Student's *t*-test. (D) Representative H&E images of *Cdh1*<sup>-/-</sup>*RHOA*<sup>Y42C/+</sup> organoids infected with EV, TCF-DN or YAP-DN. Scale bar = 100  $\mu$ m. (E) Representative images of NSG flank tumors generated from *Cdh1*<sup>-/-</sup>*RHOA*<sup>Y42C/+</sup> organoids with EV, TCF4-DN or YAP-DN. (F) *In vitro* proliferation (CellTiter-Glo) of *Trp53*<sup>-/-</sup>*Kras*<sup>G12D/+</sup> organoids with ectopic expression of TCF4-DN, YAP-DN or combination. Data are mean  $\pm$  S.E.M. Comparisons (no significance) were made between EV and genetic perturbation groups using unpaired two-tailed Student's *t*-test. Representative images of phase contrast (G) and H&E staining (H) of *Cdh1*<sup>-/-</sup>*RHOA*<sup>Y42C/+</sup> organoids treated for 48 h with DMSO, ICG-001 (antagonist of  $\beta$ -catenin/TCF4 binding, 5  $\mu$ M), MK-2206 (AKT inhibitor, 2  $\mu$ M), verteporfin (YAP inhibitor, 5  $\mu$ M) or the indicated combinations. Scale bar = 100  $\mu$ m. (I) *In vitro* proliferation (CellTiter-Glo) of *Cdh1*<sup>-/-</sup>*RHOA*<sup>Y42C/+</sup> or *Trp53*<sup>-/-</sup>*Kras*<sup>G12D/+</sup> organoids treated for 48 h with DMSO or ICG-001 (5  $\mu$ M), MK-2206 (2  $\mu$ M) or verteporfin (5  $\mu$ M). Data are mean  $\pm$  S.E.M. \**P*<0.05, \*\**P*<0.01, unpaired two-tailed Student's *t*-test. (J) Representative immunoblots of *Cdh1*<sup>-/-</sup>*RHOA*<sup>Y42C/+</sup> organoids treated for 24 h with DMSO or ICG-001 (5  $\mu$ M), MK-2206 (2  $\mu$ M) or verteporfin (5  $\mu$ M), or the indicated combinations (n = 3 independent experiments). (K-L) *In vitro* proliferation (CellTiter-Glo) of *Cdh1*<sup>-/-</sup> (K) or normal (L) organoids treated for 48 h with DMSO or ICG-001 (5  $\mu$ M) combined with verteporfin (5  $\mu$ M). Data are mean  $\pm$  S.E.M. No significance, unpaired two-tailed Student's *t*-test.

# Supplementary Figure 6

**A**

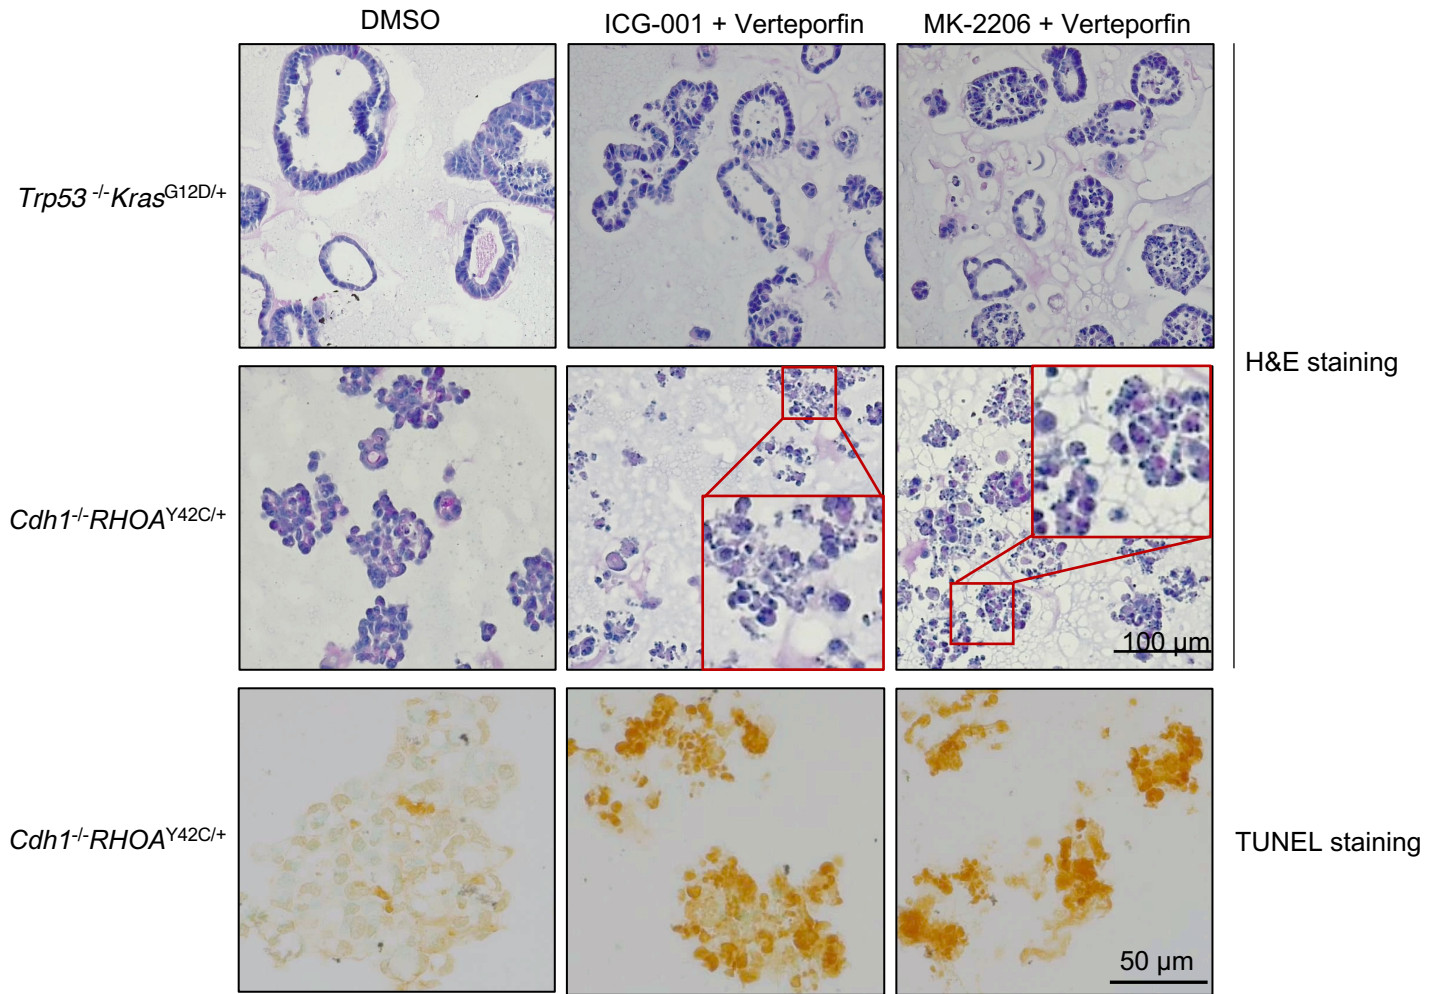

**B**

*Cdh1<sup>-/-</sup>RHOA<sup>Y42C/+</sup>* organoids

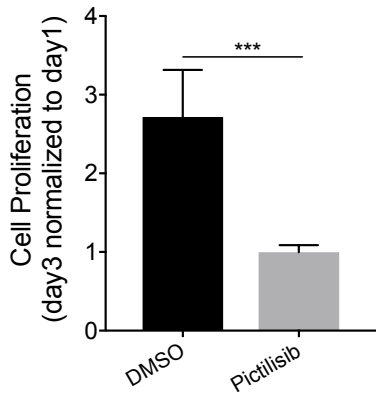

**C**

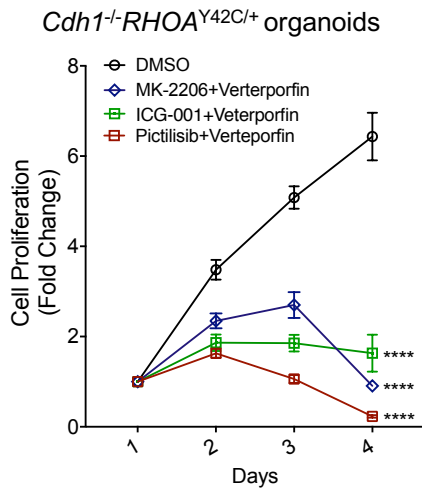

**D**

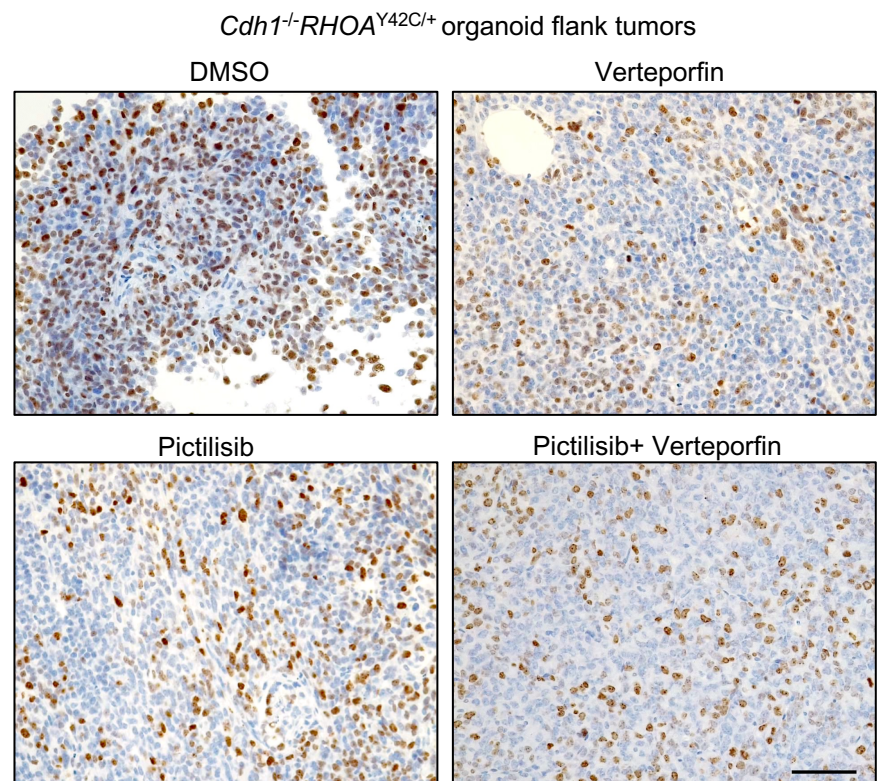

**Supplementary Figure 6. PI3K-AKT inhibition and YAP inhibition specifically induces apoptosis of *Cdh1*<sup>-/-</sup>*RHOA*<sup>Y42C/+</sup> organoids and inhibits cell proliferation**

(A) Representative images of H&E staining of *Trp53*<sup>-/-</sup>*Kras*<sup>G12D/+</sup> organoids (top) or *Cdh1*<sup>-/-</sup>*RHOA*<sup>Y42C/+</sup> organoids (middle) and TUNEL staining (bottom) of *Cdh1*<sup>-/-</sup>*RHOA*<sup>Y42C/+</sup> organoids treated for 48 h with verteporfin (5 μM) combined with ICG-001 (5 μM) or MK-2206 (2 μM). For TUNEL staining, green: negative for apoptosis; brown: positive for apoptosis. (B) *In vitro* proliferation (CellTiter-Glo) of *Cdh1*<sup>-/-</sup>*RHOA*<sup>Y42C/+</sup> organoids treated with DMSO or PI3K inhibitor pictilisib (2 μM) for 48 h. Data are mean ± S.D. \*\*\**P*<0.001, unpaired two-tailed Student's *t*-test. (C) *In vitro* proliferation of *Cdh1*<sup>-/-</sup>*RHOA*<sup>Y42C/+</sup> organoids treated with DMSO or indicated combination (pictilisib, 2 μM; verteporfin, 5 μM; ICG-001, 5 μM; MK-2206, 2 μM). \*\*\*\**P*<0.0001, two-way ANOVA (treatment groups versus DMSO). (D) Representative images of Ki67 staining of *Cdh1*<sup>-/-</sup>*RHOA*<sup>Y42C/+</sup> organoid flank tumors treated with DMSO or pictilisib (75 mg/kg), verteporfin (100 mg/kg), or the combination. Scale bar = 100 μm.

# Supplementary Figure 7 (A-H)

**A**

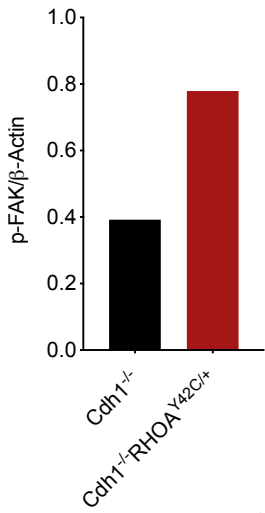

**B**

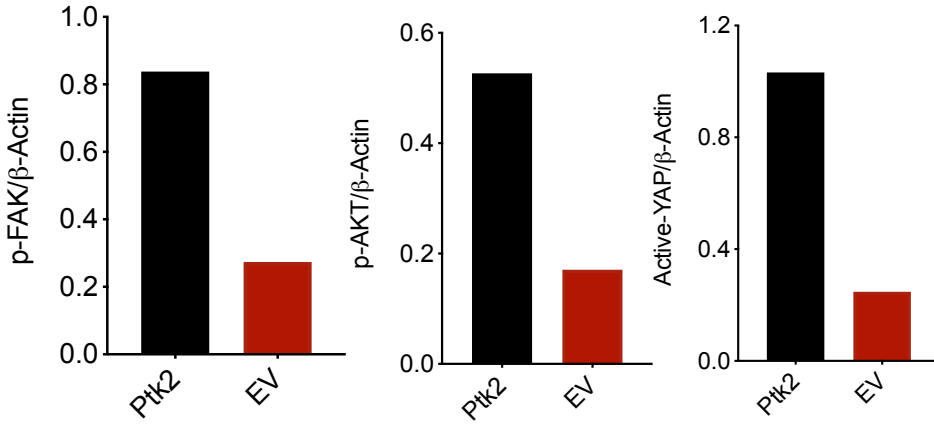

**C**

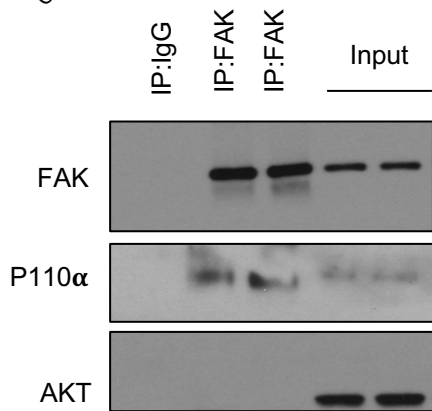

**D**

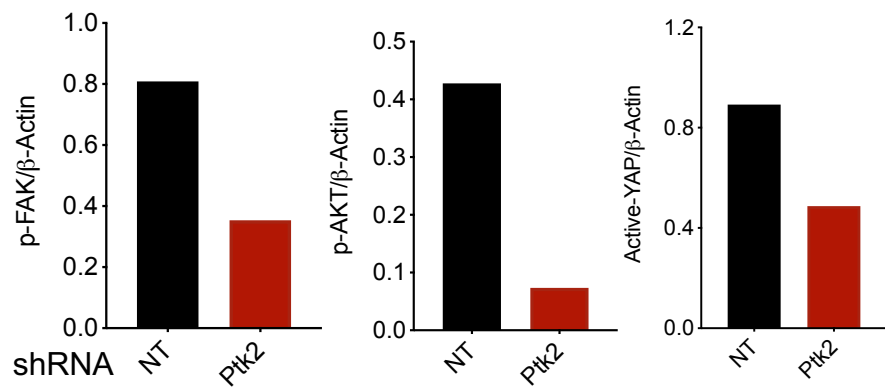

**E**

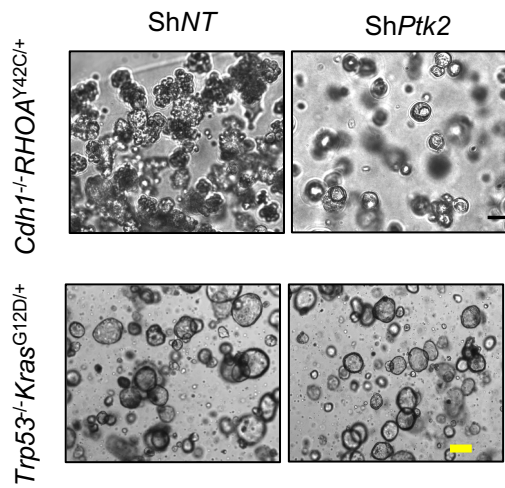

**F**

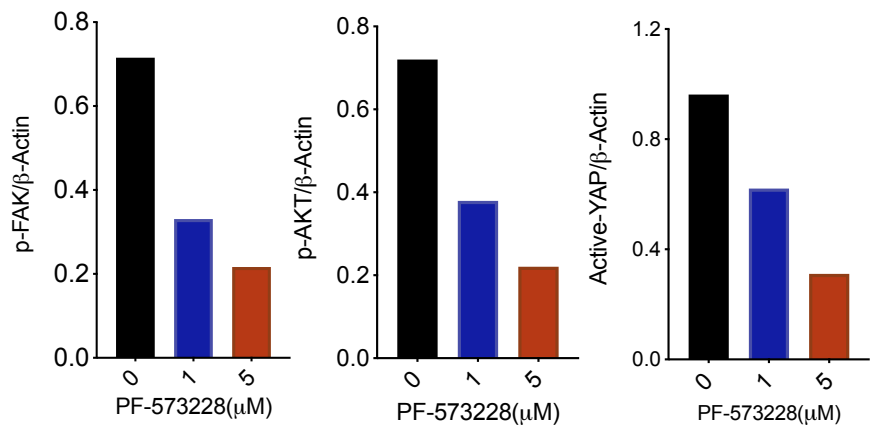

**G**

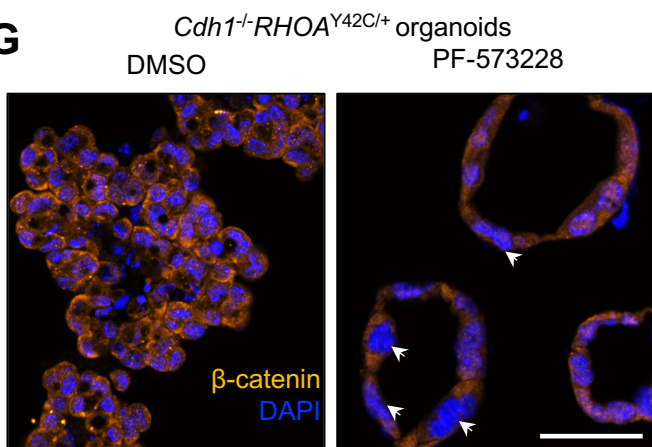

**H**

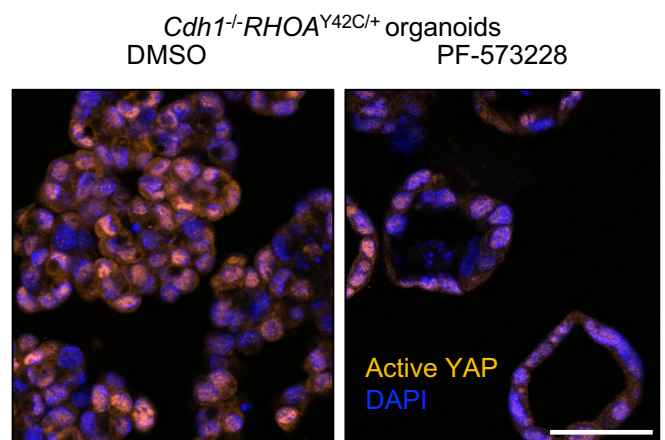

# Supplementary Figure 7 (I-R)

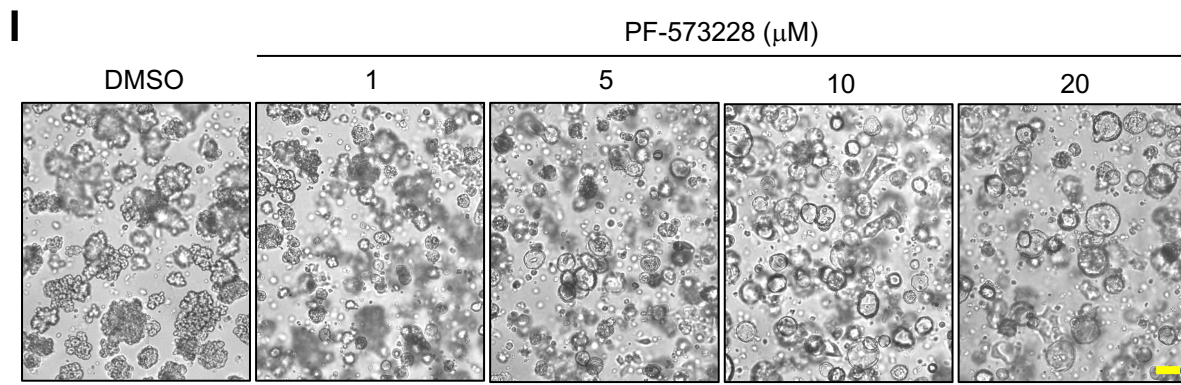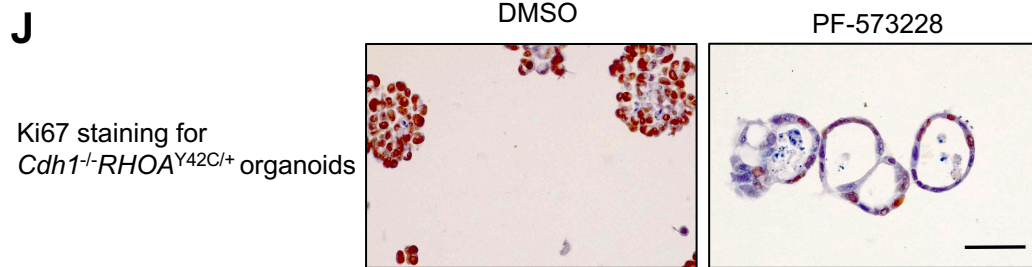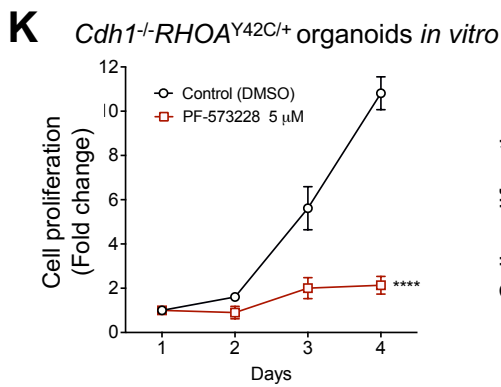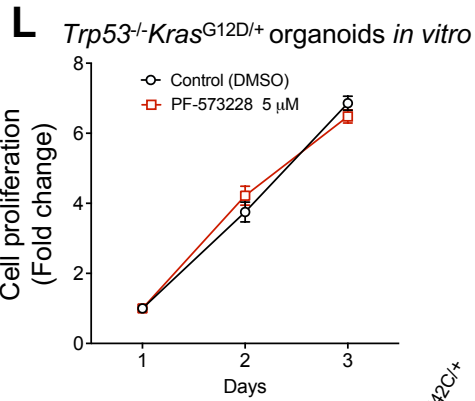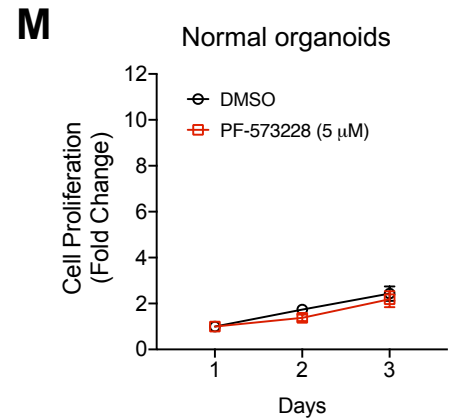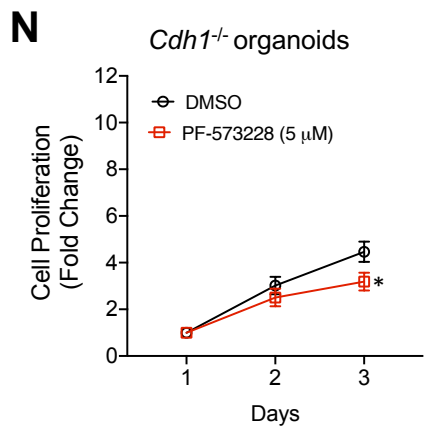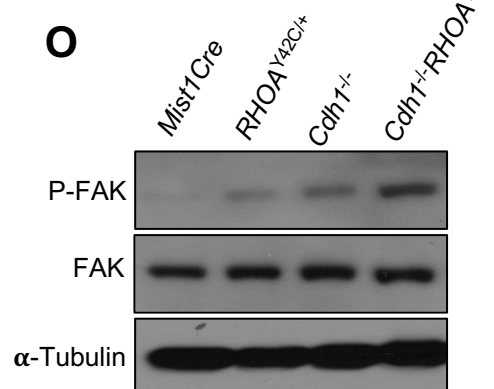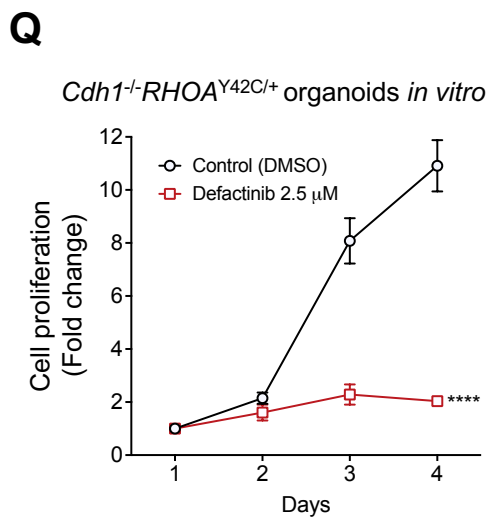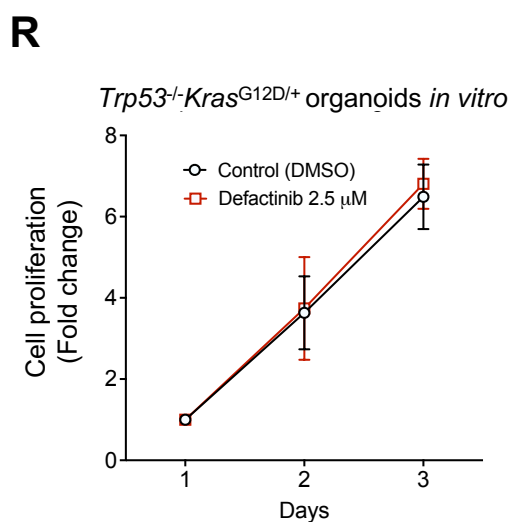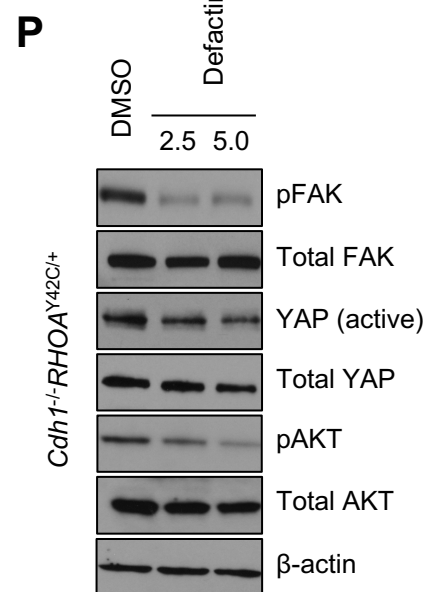



**Supplementary Figure 7. FAK is required for *Cdh1*<sup>-/-</sup>*RHOA*<sup>Y42C/+</sup>-induced transformation and for  $\beta$ -catenin and YAP activation.**

(A-B) Quantitation of Fig.6B and Fig.6C, respectively. (C) Immunoblots for P110 $\alpha$  and AKT of *Cdh1*<sup>-/-</sup>*RHOA*<sup>Y42C/+</sup> organoids immunoprecipitated with anti-FAK antibody (n = 3 independent experiments). (D) Quantitation of Fig.6F.

(E) Representative phase contrast images of *Cdh1*<sup>-/-</sup> *RHOA*<sup>Y42C/+</sup> organoids or *Trp53*<sup>-/-</sup> *Kras*<sup>G12D/+</sup> organoids following *shRNA*-mediated *Ptk2* (FAK) knockdown or non-targeting control. Scale bar = 100  $\mu$ m. (F) ) Quantitation of Fig.6G. (G-H) Confocal immunofluorescence images of (G)  $\beta$ -catenin and (H) active (non-phosphorylated) YAP in *Cdh1*<sup>-/-</sup>*RHOA*<sup>Y42C/+</sup> organoids treated as in panel (C). Scale bar = 50  $\mu$ m.

(I) Phase contrast images of *Cdh1*<sup>-/-</sup> *RHOA*<sup>Y42C/+</sup> organoids treated with DMSO or FAK inhibitor PF-573228 at the indicated doses. Scale bar = 100  $\mu$ m. (J) Representative images of Ki67 staining of *Cdh1*<sup>-/-</sup>*RHOA*<sup>Y42C/+</sup> organoids treated for 48 h with DMSO or PF-573228 (5  $\mu$ M). Scale bar = 50  $\mu$ m. (K) *In vitro* proliferation (CellTiter-Glo) of *Cdh1*<sup>-/-</sup>*RHOA*<sup>Y42C/+</sup> organoids treated for the indicated days with DMSO or PF573228 (5  $\mu$ M). Data are mean  $\pm$  S.D. \*\*\*\**P*<0.0001, two-way ANOVA.

(L-M) *In vitro* proliferation of (L) *Trp53*<sup>-/-</sup>*Kras*<sup>G12D/+</sup> or (M) normal organoids treated as in panel (K). No significance, two-way ANOVA (PF-573228 versus DMSO). Data are mean  $\pm$  S.D. (N) *In vitro* proliferation (CellTiter-Glo) of *Cdh1*<sup>-/-</sup> organoids treated for the indicated days with DMSO or PF573228 (5  $\mu$ M). Data are mean  $\pm$  S.D.

\**P*<0.05, two-way ANOVA. (O) Representative immunoblotting of gastric organoids with noted genotypes (n = 3 independent experiments). (P) Immunoblots of *Cdh1*<sup>-/-</sup> *RHOA*<sup>Y42C/+</sup> organoids treated for 48 h with DMSO or FAK inhibitor defactinib (2.5  $\mu$ M or 5  $\mu$ M) (n = 3 independent experiments). (Q) *In vitro* proliferation of *Cdh1*<sup>-/-</sup> *RHOA*<sup>Y42C/+</sup> organoids treated for the indicated days with DMSO or defactinib (2.5  $\mu$ M). Data are mean  $\pm$  S.D. \*\*\*\**P*<0.0001, two-way ANOVA. (R) *In vitro* proliferation of *Trp53*<sup>-/-</sup>*Kras*<sup>G12D/+</sup> organoids treated as in panel (I). No significance, two-way ANOVA (defactinib versus DMSO). Data are mean  $\pm$  S.D.

# Supplementary Figure 8 (A-H)

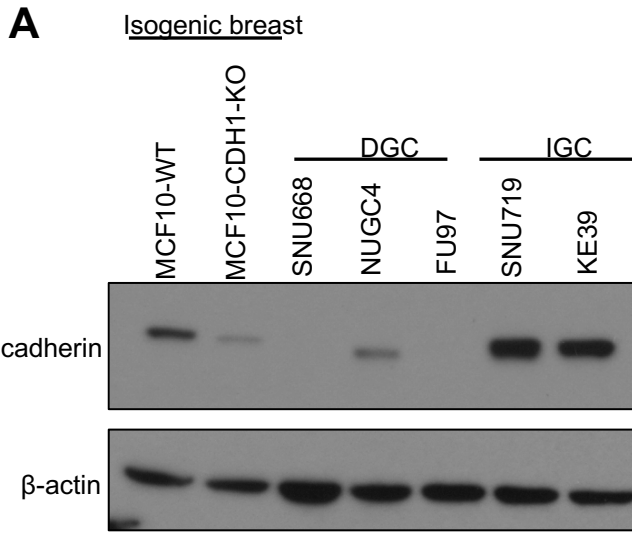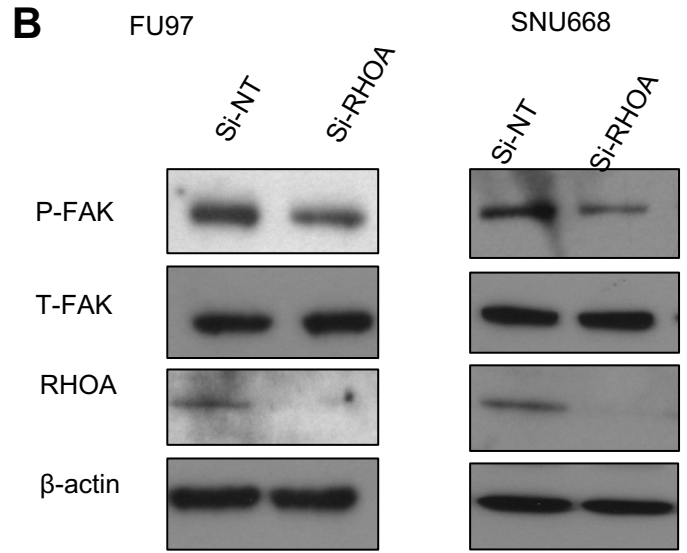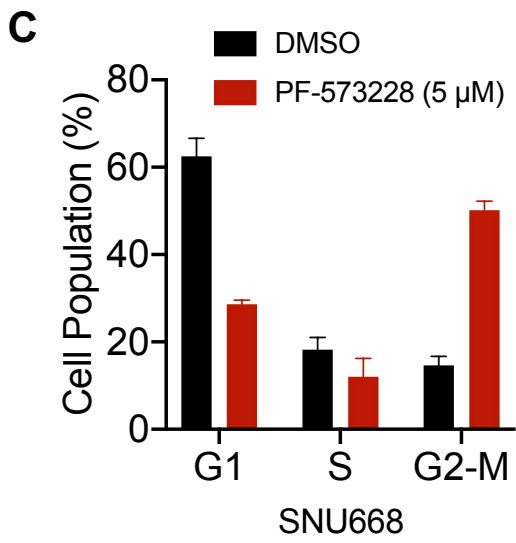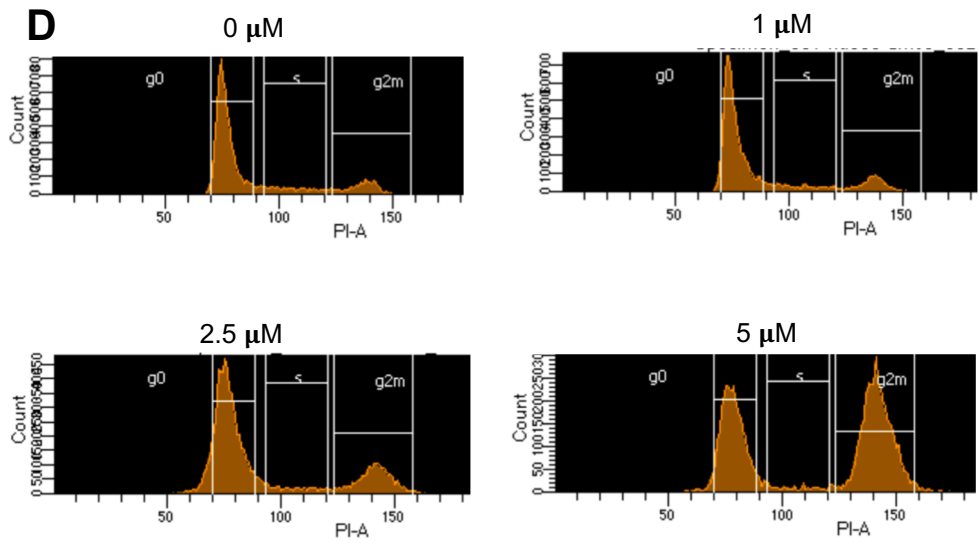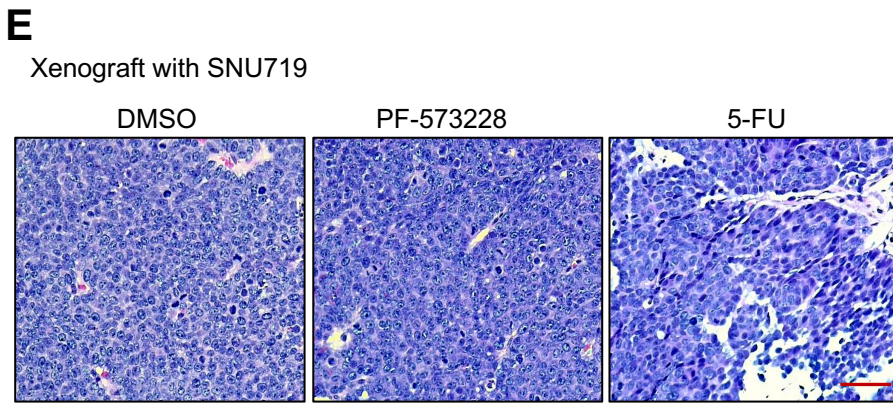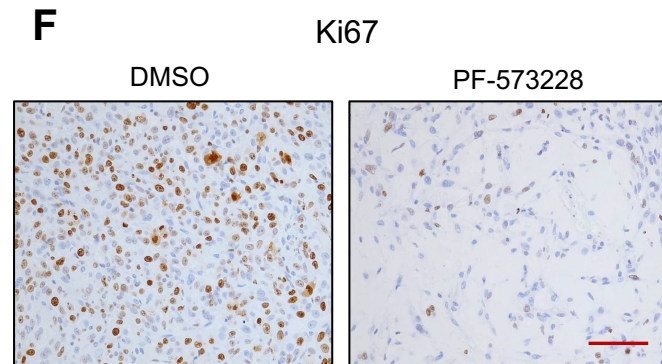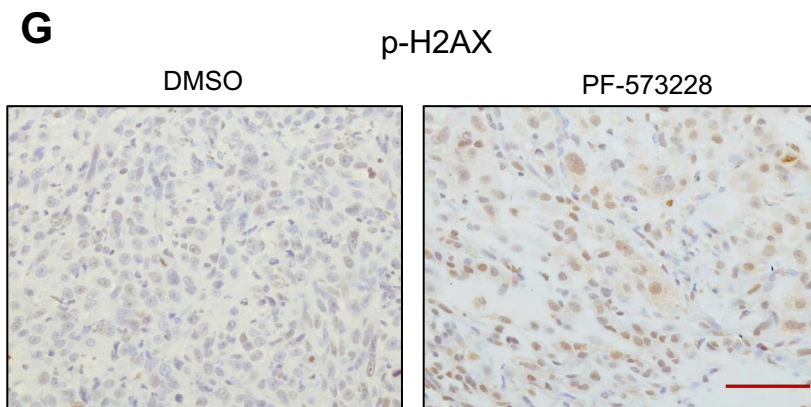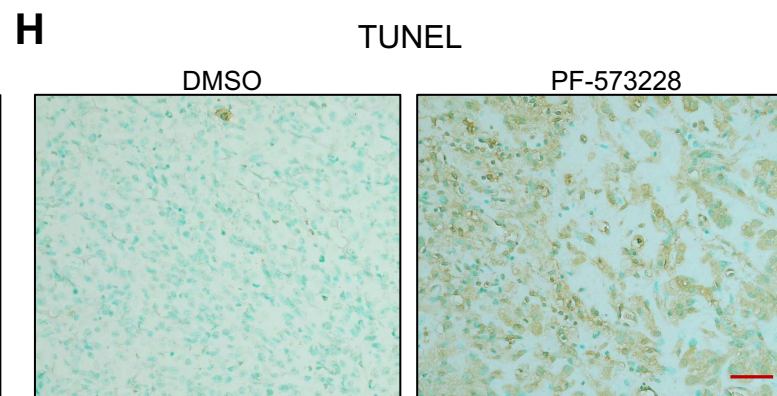

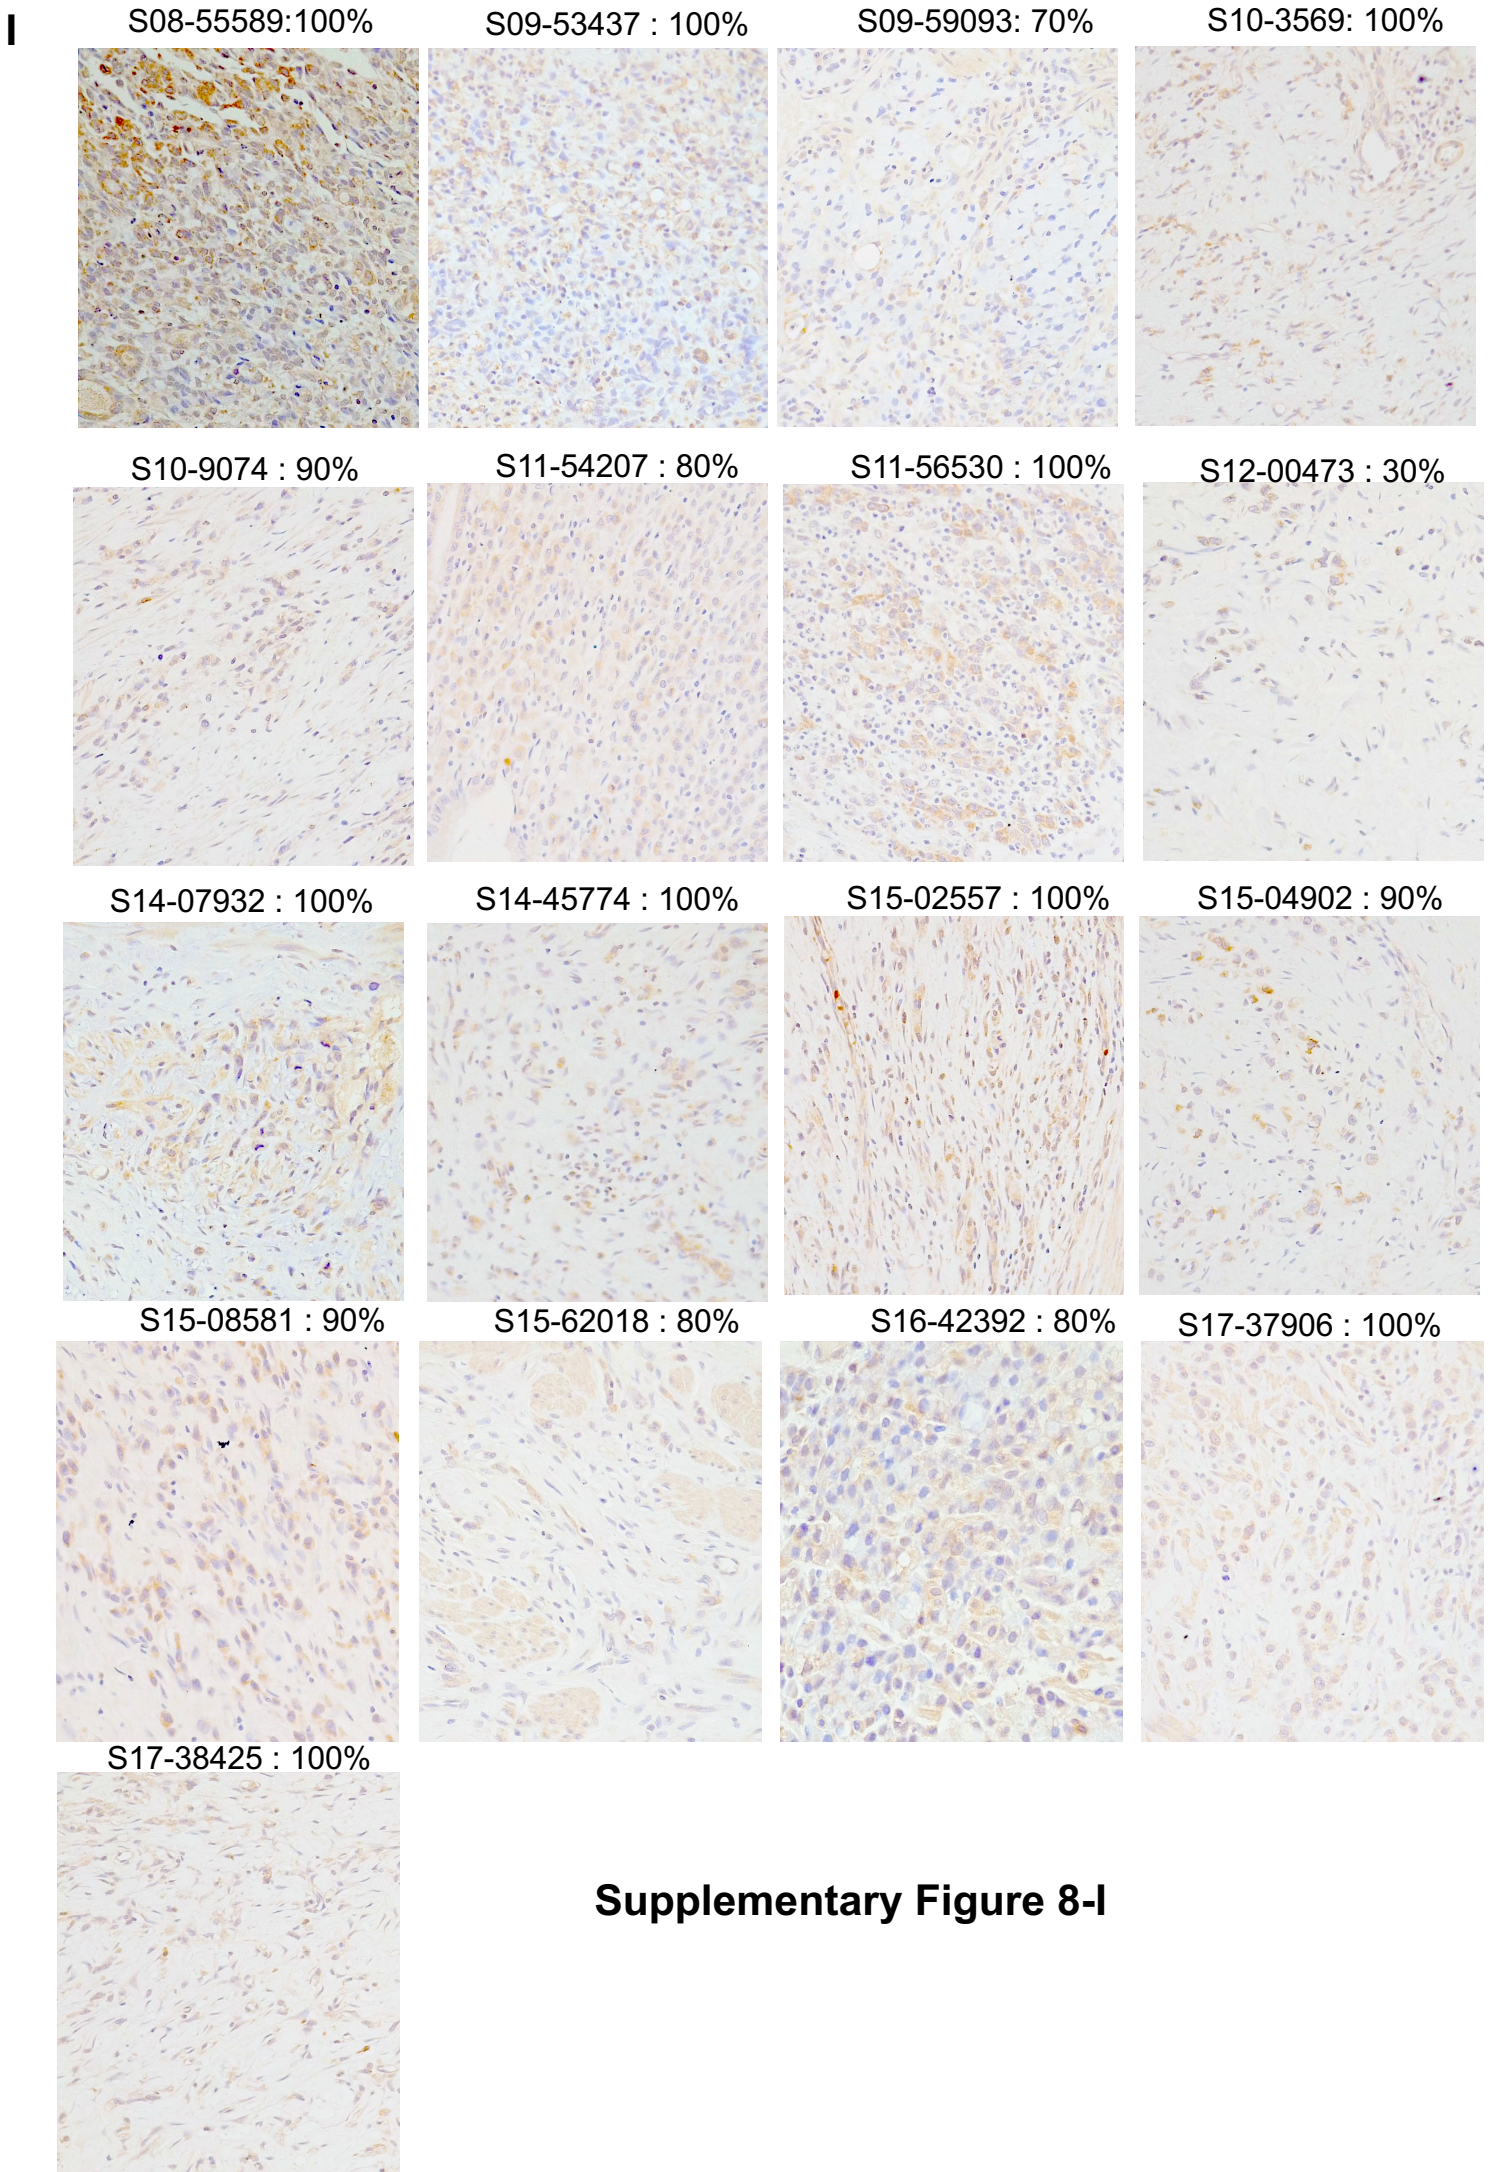

**Supplementary Figure 8-I**

## Supplementary Figure 8-J

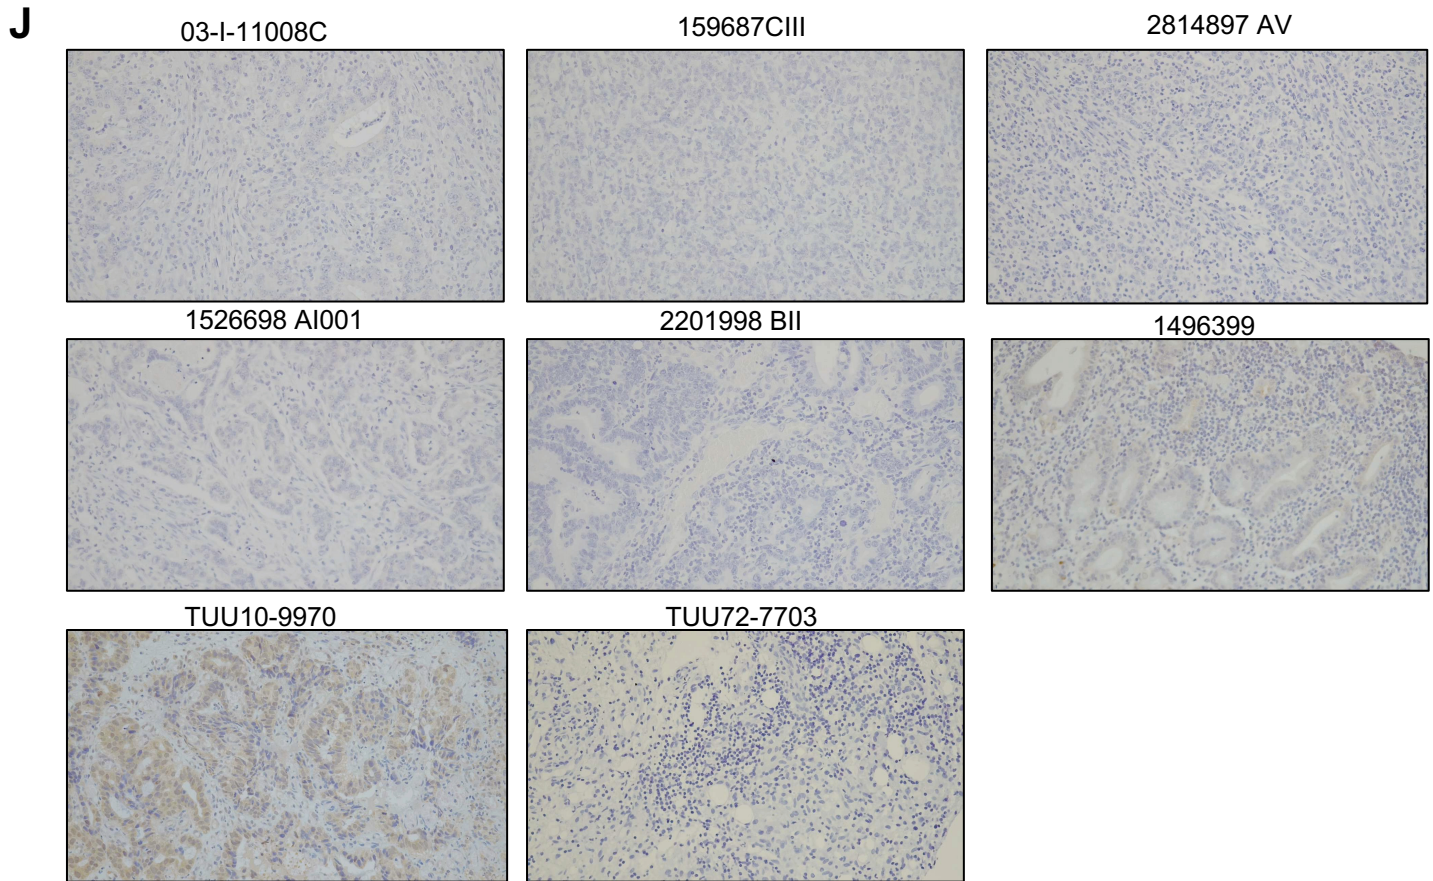

### Supplementary Figure 8. FAK is activated in human diffuse gastric cancer

(A) Immunoblots for E-cadherin from MCF10 cells with CDH1-WT or CDH1-KO as the controls; DGC cell lines: SNU668, NUGC4 and FU97, and IGC lines SNU719 and KE39 (n = 3 independent experiments). (B) Representative immunoblots of FU97 and SNU668 cells with silencing of *RHOA* or Non-targeting (NT) control (n = 3 independent experiments). (C-D) Flow cytometry for the cell cycle analyses with SNU668 cells treated with DMSO or PF-573228 (5  $\mu$ M) for 48h (C) or with a dose treatment (D). (E) Representative images of H&E of tumors from Fig. 7G, Scale bar = 100  $\mu$ m. (F-H) Representative images of (F) Ki67 staining or (G) gamma-H2A.X (S139) staining or (H) TUNEL staining of tumors from Fig.7F, Scale bar = 100  $\mu$ m. (I) Immunohistochemistry of p-FAK staining images for tumors from all the other 17 patients of diffuse gastric cancer and the percentage of positive staining of tumor cells for each sample. (J) Immunohistochemistry of p-FAK staining images for tumors from 8 patients of Non-DGC.
